# Supplementary material for: 3 + 2 + X: What is the most useful depolarization input for retrieving microphysical properties of non-spherical particles from lidar measurements by assuming spheroidal particle shapes?
Source: Copernicus journal article supplement (doi:10.5194/amt-2019-71), 2019-03-20
Supplement: Supplementary file [file amt-2019-71-AC1-supplement.pdf]

Interactive comments on “3 + 2 + X: What is the most useful depolarization input for retrieving microphysical properties of non-spherical particles from lidar measurements by assuming spheroidal particle shapes?” by Matthias Tesche et al.

Referee comments are noted in black. Our replies are given in blue.

We would like to thank all Referees for their constructive comments. Please find our point-by-point replies below. A list of added references is given at the end of this reply letter. We have also attached a revised version of the manuscript with all changes marked.

### **Anonymous Referee #1**

The paper is appropriate for AMT and a good contribution to the literature of lidar methods and technologies.

However, improvements are needed.

The discussion needs to be extended. Throughout the paper it is assumed that the fine mode (particles with diameter < 1 micrometer) contains ONLY spherical (anthropogenic) particles. But in reality, the fine mode also contains non-spherical dust particles and may contain also non-spherical smoke particles (pronounced accumulation mode). This can be concluded from the Burton et al. (2015) paper with a strong wavelength dependence of the depolarization ratio found for dry smoke particles in the upper troposphere. It was confirmed by Hu et al, (2019) and Haarig et al. (2018) for the 2017 stratospheric smoke event. All this is not considered in the paper. Thus, the recommendations given in the paper regarding the configuration of a multiwavelength polarization lidar are of limited use. It must be clearly stated for what scenarios the conclusions hold! Aerosol scenarios with a large non-spherical fine mode fraction are not considered!

The assume that the Referee is referring to the dust ratio as inferred from the measurements of the particle linear depolarisation ratio and used to assess the retrieved spheroid fractions. In that case, the Referee is correct that our study assumes that coarse-mode dust is mixed with a spherical fine-mode aerosol. This is now specifically addressed in the new Section 3.2 *Retrieval of dust fraction from optical data*. As to the inversion routine, we would like to clarify that the spheroid fraction as first used by Veselovskii et al. (2010) does not depend on radius and accounts for both the fine and coarse mode. Therefore, cases with non-spherical particles in the fine mode can be properly described by mathematical module we use in the inversion routine Any solution described by a high value of spheroid fraction and a pronounced fine mode (in particular, monomodal particle size distributions) refers to exactly the aerosol scenarios mentioned by the Referee.

And the other important point is that the study here is based on a spheroidal dust model. As long as a trustworthy dust shape model is not available, all the simulations, all the inversion results, are just speculation! This must be repeated more frequently throughout the text. There is simply no solid conclusion what configuration the best is, except 3+2+3!

We have added revisions throughout the text to better emphasise two points, as also suggested by the other Referees: (i) that the Dubovik model is not a universal spheroid model as it

applies a fixed axis-ratio distribution and a specific oblate-to-prolate ratio for the spheroids and (ii) that our conclusions only hold for the application of this particular model.

Some details:

P2, L28-29: All these inversion methods with spheroidal dust particles are not convincing. Yes, the Tesche 2009, 2011 way is much more convincing! Why is the alternative concept (dust/non-dust separation by means of the particle depolarization ratio) approach not discussed in more detail? There is also the next-step approach by Mamouri et al (2016 and 2017) to circumvent the spheroidal shape problems. A more complete discussion is needed. What does it help to have even a 3+3+3 system when we need to base the full concept on the questionable dust spheroidal model?

The Referee is rightfully criticising that the text on the aerosol-type separation methodologies has not been sufficient. We have expanded the description of the alternative concept by introducing a new Section 3.2 Retrieval of dust fraction from optical data. Finally, we have changed the dust ratio values in Table 1 to a range of likely dust contribution as obtained from following Tesche et al. (2009b) and Mamouri and Ansmann (2014; 2017) for the lower and upper limit, respectively.

The text in the introduction has been revised to: “*Scattering kernels based on Mie theory cannot represent light scattering by non-spherical particles, i.e. particles that lead to increased  $\delta_\lambda$  in a lidar measurement. A way to circumvent this problem is to split the optical input according to the information related to spherical and non-spherical particles. The thus obtained data sets can subsequently be used to run the inversion considering only spherical scatterers (i.e. Mie kernels) and non-spherical scatterers (i.e. spheroid kernels), respectively. We provide a detailed discussion of this aspect in Section 3.3. However, the aim of this work is to gain insight into the performance of the inversion using Dubovik’s model for mixed dust cases as such scenarios have not yet been considered in earlier studies.*”

The new text in Section 3.2 Retrieval of dust fraction from optical data is: “*The particle linear depolarisation ratio is an intensive aerosol property that can be applied for aerosol classification (Burton et al., 2012; Groß et al., 2013. Because of its sensitivity to particle shape, it can also be used to separate the contributions of spherical and non-spherical particles to the optical parameters measured with aerosol lidar (Tesche et al., 2009b; Burton et al., 2014) or sun photometer (Shin et al., 2019). This approach study generally assumes mixtures with a coarse-mode that is composed of mineral dust and a spherical fine-mode. Tesche et al. (2009b, 2011b) use measurements of  $\delta_{532}$  together with threshold values representative for pure aerosol types to separate the contribution of dust and biomass-burning smoke to the optical properties measured with multiwavelength aerosol Raman lidar at Cape Verde. Their approach assumes an external mixture of two aerosol types. A generalised form of this method that covers a broader variety of aerosol mixtures has been presented by Burton et al. (2014) for measurements with HSRL-1. Mamouri and Ansmann (2014; 2017) have refined the aerosol-type separation further using a two-step approach that allows for the separation of contributions of coarse dust, fine dust, and a non-dust aerosol type, i.e. marine or continental aerosol.*

*In principle, these aerosol-type separation techniques can be used to obtain input data sets for the inversion of lidar data that represent the spherical and non-spherical particles in a mixed aerosol plume, respectively. The inversion could then be run with the conventional 3+2*

*input data set and the spheroid fraction (see Section 3.3) set to either 0% (i.e. Mie kernels) or 100%. In this study, however, we aim to test how the inversion performs with different combinations of additional depolarisation-ratio input to account for the contribution of non-spherical particles to the optical input data. We use the dust ratio, i.e. the ratio of dust-related to total backscatter coefficient at 532 nm, as an estimate of the dust contribution and for comparison to the spheroid fraction inferred from the inversion. Dust ratios were either taken from the DISCOVER-AQ data base (these values have been derived according to Burton et al. (2014)), or calculated following Tesche et al. (2009b) (with  $\delta_d = 0.32$  and  $\delta_{nd} = 0.01$  to replicate the values from HSRL-2) and Mamouri and Ansmann (2014; 2017) ( $\delta_{dc} = 0.39$ ,  $\delta_{df} = 0.16$ , and  $\delta_{nd} = 0.02$  to obtain the contributions of fine and coarse dust). In the discussion of our findings, we will consider the dust ratio for the two-component (Tesche et al., 2009b; Burton et al., 2014) and three-component (Mamouri and Ansmann, 2014; 2017) mixtures as lower and upper limit, respectively, of the likely dust contribution.”*

P4, L2: In the Hu et al 2019 paper (published in 2019), the extinction profiles are computed from the elastic channels only. No Raman lidar solutions, no 3+2+3.

We are sorry for the mistake. The focus of this statement was supposed to be on the capability for triple-wavelength measurements of the particle linear depolarisation ratio. The statement has been revised for clarity : *“To date, few lidar instruments have the capability to measure particle linear depolarisation ratios at three wavelengths simultaneously and we refer to Burton et al. (2015), Haarig et al. (2017a), and Hu et al. (2019).”*

On the other hand, here you kindly provide these references on the dry smoke observations, Hu, Haarig! But then you ignore all these realistic aerosol scenarios in the rest of the manuscript.

Following the suggestions of all Referees, we have introduced a new Section 2: *Spectral  $\delta$  for mineral dust from measurements and modelling* and a new Figure 1 to provide a better overview over field and lab measurements of spectral particle linear depolarisation ratios as well as findings from modelling using spheroids and irregularly shaped particles. The issue that large particle linear depolarisation ratios have also been observed for biomass-burning smoke is now being discussed in this section. Nevertheless, such observations are still scarce. In addition, the focus of our study is on mixtures that include mineral dust. We are therefore confident that highly depolarising dried smoke particles don't have a large impact on our investigation.

New Figure 1 looks like this:

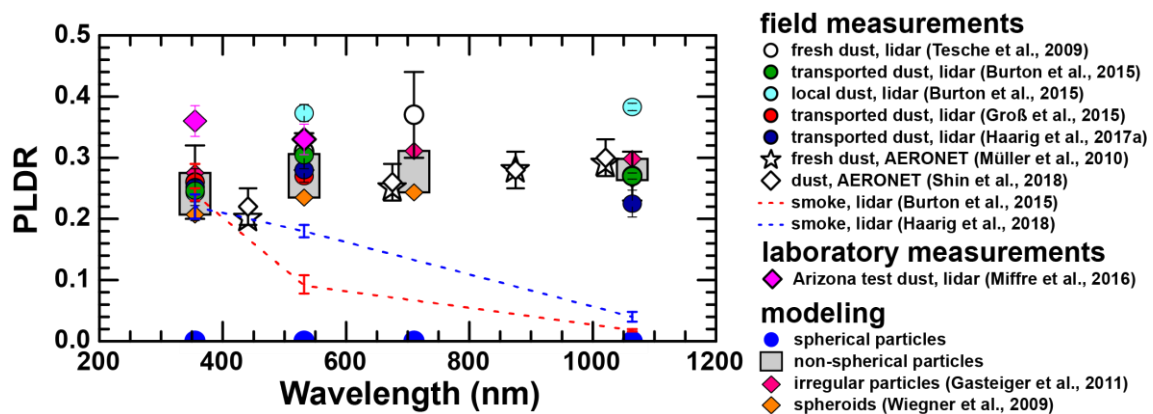

**Figure 1:** Overview of particle linear depolarisation ratios for pure mineral dust from field measurements (Tesche et al., 2009a; Burton et al., 2015; Groß et al., 2015; Haarig et al., 2017a), laboratory studies (Miffre et al., 2016), AERONET observations (Müller et al., 2013; Shin et al., 2018), and modelling (Wiegner et al., 2009; Gasteiger et al., 2011). The use of Mie theory (spherical particles) gives values of zero. The range for modelling results is defined by the studies of Wiegner et al. (2009) (lower boundary, spheroids) and Gasteiger et al. (2011) (upper boundary, mixtures of irregularly shaped particles). The blue and red dashed lines show that field measurements can reveal high depolarisation ratios for biomass-burning smoke as well (Burton et al., 2015; Haarig et al., 2018).

The text in new Section 2 is: “The particle linear depolarisation ratio  $\delta$  as measured by depolarisation lidar is the ratio of the particle backscatter coefficients measured at planes of polarisation perpendicular and parallel to the plane of polarisation of the emitted laser light (Gimmestad, 2008). Like the lidar ratio and the Ångström exponent, it is an intensive parameter that takes on characteristic values for different aerosol types (Burton et al., 2012). It is most sensitive to the shape of the scattering particles, i.e.  $\delta = 0$  for spherical scatterers (or those that appear spherical with respect to the considered wavelength) and increases with particle non-sphericity. Reliable measurements of  $\delta$  require careful instrument characterisation together with dedicated calibration efforts (Freudenthaler et al., 2009; Freudenthaler, 2016). Light-scattering by non-spherical particles such as mineral dust poses a great challenge for applications in atmospheric science as it cannot be described by Mie scattering. The problem has been addressed by introducing a variety of non-spherical model particles (Kahnert et al., 2014) that differ considerably in the capability to properly describe light depolarisation (specifically at the  $180^\circ$  backscatter direction crucial for lidar). Spheroids were found to be particularly versatile for this purpose as they allow for addressing different degrees of non-sphericity in mathematically simple expressions. A specific spheroid model is the one introduced by Dubovik et al. (2006). It has been developed for the analysis of AERONET sun photometer measurements, and thus, is optimised for passive remote sensing applications. It has been applied in the inversion of lidar data Veselovskii et al. (2010) and to retrieve lidars-specific parameters (Müller et al., 2010; Shin et al., 2018) even though it has not designed to describe light scattering at  $180^\circ$  backscatter direction. Dubovik’s spheroidal model features a defined aspect-ratio distribution which separates it from other applications of spheroidal models used for lidar applications (Wiegner et al., 2009; Gasteiger and Freudenthaler, 2014).

Figure 1 presents spectral particle linear depolarisation ratios from laboratory (Miffre et al., 2016) and field measurements (Tesche et al., 2009a; Burton et al., 2015; Groß et al., 2015;

Haarig et al., 2017a) with lidar, the analysis of AERONET observations using the Dubovik model (Müller et al., 2010; Shin et al., 2018), and modelling using spheroids (Wiegner et al., 2009) and other irregularly shaped particles (Gasteiger et al., 2011) to mimic the light-scattering properties of mineral dust. The purpose of the figure is to provide some context on the range of particle linear depolarisation ratios for mineral dust as inferred from measurements and modelling. Field measurements performed in Morocco (Teschke et al., 2009a), at Barbados (Groß et al., 2015; Haarig et al., 2017a) or with research aircraft over the Caribbean and the Chihuahuan Desert (Burton et al., 2015) show values of  $\delta_d$  in the range from 0.22 to 0.38 at the common lidar wavelengths 355, 532, and 1064 nm. Laboratory measurements of Arizona Test Dust (Miffre et al., 2016) confirm the field measurements at 532nm and give a value of 0.35 at 355 nm which is about 0.1 larger than most field measurements at this wavelength. However, Miffre et al. (2016) investigated only two size distributions and did not consider particles with diameters larger than 800nm for their study. Figure 1 also gives  $\delta_\lambda$  as obtained from the inversion of AERONET sun photometer measurements using Dubovik's model (Müller et al., 2010; Shin et al., 2018). AERONET derives values at different wavelengths than the lidar observations, i.e. 440, 670, 870, and 1020 nm. In general, AERONET-derived  $\delta$  are closest to the lidar reference at the longest wavelength. The values at 440 nm are lower than the lidar observations at both 355 and 532 nm though a direct comparison is impossible due to the mismatch in the wavelengths of observations. For comparison, Figure 1 gives the results of modelling studies using Mie scattering ( $\delta_\lambda = 0$ ), a spheroid model with aspect ratios different from the one in the Dubovik model (Wiegner et al., 2009), and irregularly shaped particles (Gasteiger et al., 2011). The latter two options are considered here to open the range of modelling results (grey areas in Figure 1) of the light-scattering by non-spherical particles with specific focus on lidar application. The comparison shows that the AERONET-derived values using Dubovik's model are on the lower boundary of the values inferred using other particle geometries at wavelengths smaller than 800 nm. The large values observed with lidar can only be reproduced by Gasteiger et al. (2011). The aspect-ratio distribution characteristic for Dubovik's spheroidal model, though sufficient to reproduce laboratory measurements over a wide range of scattering angles (Dubovik et al., 2006), might hence be a limiting factor when it comes to lidar applications.

Mineral dust and volcanic ash were generally considered to be the aerosol types that show the highest values of  $\delta$  at the wavelength used in aerosol lidars. This would make it easy to detect their occurrence in a lidar measurement. However, recent case studies have shown that biomass-burning smoke can also show values as high as  $\delta = 0.20\text{--}0.25$  at 355 and 532 nm (Burton et al., 2015; Haarig et al., 2018; Hu et al., 2019). Two of the observed cases of highly depolarising smoke particles are also presented in Figure 1 as a contrast to the observed  $\delta$  spectra for mineral dust. Light-scattering simulations have shown that such values can be reproduced using spheroids of nearly spherical shape (with aspect ratios close to unity, Bi et al. 2018; Gialitaki et al. 2019) and agglomerates of spheroids (Mishchenko et al., 2016). In both cases, the model particles need to contain substantial amounts of non- or weakly absorbing material with an imaginary part of the refractive index below 0.01."

P5, L16: Table 1 corroborates my opinion! The considered non-dust part is just spherical fine mode aerosol (urban haze, smoke). The paper does not cover the full reality of aerosol scenarios.



The values of the dust ratio given in Table 1 have been revised to now cover a range as described in new Section 3.2 (see also the detailed reply to the Referee's second comment).

P9, L2-6: We need such statements more frequently!

Revisions have been made throughout the manuscript to emphasise that we are considering the specific spheroidal model of *Dubovik et al. (2006)* which has not been developed primarily for lidar applications.

P9, L7-L17: All this is confusing! Again, the Shin et al (2018) results are based on the spheroidal model. So why should the results agree with observations? And lidars do not measure lidar ratios and depol ratios at 870 and 1020 nm! Gasteiger played around with many shape configurations and failed because there is no realistic shape model for dust available. At least Gasteiger showed how sensitive all the modelled dust optical properties depend on particle shape.

We have added the new Section 2: *Spectral  $\delta$  for mineral dust from measurements and modelling* and a new Figure 1 to provide a better overview over field and lab measurements of spectral particle linear depolarisation ratios as well as findings from modelling using spheroids and irregularly shaped particles. We hope that this Section can provide the context for discussing the depolarisation ratios inferred from AERONET measurements (*Shin et al., 2018*) and a more universal spheroid model (*Gasteiger and Freudenthaler, 2014*). We have also revised the particular paragraph to emphasise the differences connected to the different findings. We believe that it is important to present the available data even though one might not expect them to be compatible in the first place. The revised text in the discussion section now reads: *“The results we obtain from our study are somewhat contradictory to the findings of Gasteiger and Freudenthaler (2014) and Shin et al. (2018) who attribute the greatest informational value and representativeness to observations of  $\delta_{1064}$ . This is likely due to the difference in the setup of the different studies. On the one hand, Gasteiger and Freudenthaler (2014) applied a spheroid model that was constrained in neither the aspect ratio nor the oblate-to-prolate ratio of the spheroids. On the other hand, Shin et al. (2018) are referring to AERONET data which have been derived for scattering angles smaller than  $180^\circ$  (and extrapolated to the backscatter direction) and represent values for the entire atmospheric column. However, the strong and weak effects of using  $\delta_{355}$  and  $\delta_{1064}$ , respectively, in the inversion of lidar measurements of dust-containing aerosol layers based on the spheroid model of Dubovik et al. (2006) also indicate that the model's constraints on the aspect-ratio distribution and the ratio of oblates to prolates have a strong effect on making full use of the informational content provided at different wavelenghts in lidar applications. We stress again that the conclusions of this study are valid only for the inversion of lidar data that resorts to describe the light-scattering properties of non-spherical dust particles by means of the spheroid model of Dubovik et al. (2006) and that any finding might be strongly related to the weaknesses of this particular light-scattering model (Müller et al., 2010, 2013). Nevertheless, no other model has been applied as widely in the inversion of lidar data (Veselovskii et al., 2010; Di Girolamo et al., 2012; Papayannis et al., 2012; Müller et al., 2013). In addition, there has so far been no systematic investigation of the usefulness of different depolarisation input for this particular inversion setup. We therefore believe that this work will contribute to a better understanding of the usefulness and limitations of the model of Dubovik et al. (2006) in lidar applications as well as to further emphasise the need for a more general model to describe light-scattering by non-spherical particles at very large scattering angles.*

*Following on the initial work of Veselovskii et al. (2010), we have performed the first systematic investigation of the effect of all possible combinations of depolarization-related inversion input at the wavelengths of 355, 532, and 1064nm on the retrieved aerosol microphysical properties. The aim of this study is to assess the performance of the inversion procedure to lidar measurements conducted in the presence of mixture of spherical and non-spherical particles. So far, inversions on the presence of mineral dust have only been attempted if pure-dust conditions could be assumed (Veselovskii et al., 2010; Di Girolamo et al., 2012) or of the contribution of the non-spherical scatterers had been screened from the optical input data (Teschke et al., 2011a, b)."*

P9, L18-27: The authors performed...systematic investigations...with a wrong shape model!....in contradiction with Gasteiger and Freudenthaler! Sure, what did you expect?

As stated in the reply to the previous comment, we have revised the text for stronger emphasis on the differences between the different approaches.

At the end, the discussion gives the impression: Because we do not have a real alternative, we take the spheroidal model, and assume that all this is quite ok! But it is not ok!

The Referee is certainly correct that the spheroidal Dubovik model does not mark the end of the road when it comes to lidar applications. But despite its known limitations and certainly also because of a lack of alternatives, it is being applied for the inversion of lidar data as we have mentioned in the introduction to the paper. We therefore think that it is important to present an investigation of the effect of using all possibilities of different input data for the inversion using the Dubovik model. Such a relational investigations has not yet been presented. We do not state that all is quite okay. In the revised manuscript we state repeatedly that the presented findings are only applicable to the specific inversion setup we have used in our study. Following the suggestion of another Referee we have also revised the title of our manuscript to clarify that the reader should not expect a universal solution to the problem of light-scattering by non-spherical particles from this work. We have also added the following text in the third paragraph of the discussion to provide further context for our work: *"However, the strong and weak effects of using  $\delta_{355}$  and  $\delta_{1064}$ , respectively, in the inversion of lidar measurements of dust-containing aerosol layers based on the spheroid model of Dubovik et al. (2006) also indicate that the model's constraints on the aspect-ratio distribution and the ratio of oblates to prolates have a strong effect on making full use of the informational content provided at different wavelengths in lidar applications. We stress again that the conclusions of this study are valid only for the inversion of lidar data that resorts to describe the light-scattering properties of non-spherical dust particles by means of the spheroid model of Dubovik et al. (2006) and that any finding might be strongly related to the weaknesses of this particular light-scattering model (Müller et al., 2010, 2013). Nevertheless, no other model has been applied as widely in the inversion of lidar data (Veselovskii et al., 2010; Di Girolamo et al., 2012; Papayannis et al., 2012; Müller et al., 2013). In addition, there has so far been no systematic investigation of the usefulness of different depolarisation input for this particular inversion setup. We therefore believe that this work will contribute to a better understanding of the usefulness and limitations of the model of Dubovik et al. (2006) in lidar applications as well as to further emphasise the need for a more general model to describe light-scattering by non-spherical particles at very large scattering angles."*

Figure 2, and also P11, L15: Tesche et al 2009 is not the end of the street (separation of dust and non-dust with one depol ratio). The Mamouri 2014 and 2017 papers extended the approach towards fine dust and coarse dust separation...That should be mentioned! They used different depol values for fine mode and coarse mode. And this is obviously the reality! And

then you will get higher dust fractions than the one shown in Figure 2 by using the Tesche 2009 approach. All this is not mentioned in the manuscript. So the discussion is incomplete. Fortunately, it is considered in the inversion models (dependence of the depolarization ratio on particle size). The size dependence was already shown by Gasteiger and in many other papers and are now even measured with polarization OPCs (Tian et al., ACP 2018). However, one has to be careful, POPC measure at 120 deg, lidar at 180 deg. But the size dependence of the depol is similar to what is measured for example by Sakai, Appl. Opt 2010 or in the AIDA KIT chamber...at 180deg.

This issue of the aerosol-type separation is now addressed in more detail in new Section 3.2 (see also the detailed reply to the Referee's second comment). In addition, we have revised the figures (now Figures 3, 5, and 6) to show a range of likely dust ratios with *Tesche et al.* (2009b) as lower and fine plus coarse dust following *Mamouri and Ansmann* (2014; 2017) as upper limit rather than a line.

Concerning the figures: It would be good to have the legend I: -, II: 355 nm, III: 532 nm always shown in all figures (as a tall table with 8 lines below each other). It will not take much space. I had to take a piece of paper, wrote down all the scenarios to have this information always present when stepping through all the figures....

The legends of all figures have been changed from Set name to the values of the used wavelengths.

Confusing Figure 6! The message is obvious, but the scatter in the results is large as well.

We don't know what to reply to this comment. We are aware that the figures are somewhat hard to understand instantly without reading the explanations in the text. We have revised the figures and figure captions to ease the accessibility of the figure content.

Confusing Figure 7: Set II / Set V can easily be interpreted as ratio.... One has to read all the text in the caption and in the figure carefully before looking at the results. And then again, the question: what was Set I and what was Set V, and so on....?

The figure (now Figure 8) has been revised to clearly state the wavelengths and to avoid the interpretation that ratios are shown. In addition, we have added results for the complex refractive index as suggested by the other Referees.

Then Figure 8,... even a further decrease in information, no x-axis and y-axis text anymore, just the hint: same as in Figure 7.

The figure has been removed from the manuscript.

So, all in all, it was really not easy to review this paper and these figures...and thus: It was not a pleasure! So, please improve all this significantly

We are very sorry to hear this. We hope that our revisions have improved the reading experience to the Referee's satisfaction.



## Anonymous Referee #2

Authors present results, related to inversion of lidar observations, containing three depolarization ratios to the particle microphysics. This is interesting and important study. Paper is clearly written, contains new results and can be recommended for publication.

Still I think that the manuscript will become better if authors address several important points.

1. Authors use the spheroids model to mimic the scattering properties of dust or other non-spherical particles. Thus, the analysis presented is valid only for this model. By my opinion, the manuscript should start with consideration, how well the spheroid model describes depolarizing properties of real aerosols. I would suggest to compare available in literature depolarization measurements with model predictions. Some information can be found in:

- Miffre et al., Journal of Quantitative Spectroscopy & Radiative Transfer 169 (2016) 79–90
- Mamouri et al., Atmos. Meas. Tech., 10, 3403–3427, 2017 (this one is cited by authors)
- The issues related to modeling of the smoke depolarization ratio are discussed also in Mishchenko et al., Appl Opt 55, No. 35, 2016.

Following the suggestions of all Referees, we have introduced a new Section 2: *Spectral  $\delta$  for mineral dust from measurements and modelling* and a new Figure 1 to provide a better overview over field and lab measurements of spectral particle linear depolarisation ratios as well as findings from modelling using spheroids and irregularly shaped particles. The issue that large particle linear depolarisation ratios have also been observed for biomass-burning smoke is now being discussed in this section.

New Figure 1 looks like this:

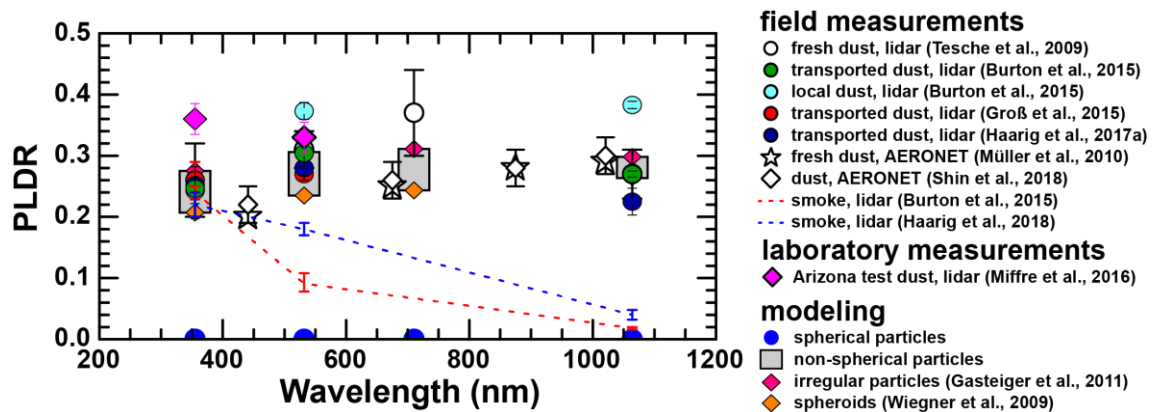

**Figure 1:** Overview of particle linear depolarisation ratios for pure mineral dust from field measurements (Tesche et al., 2009a; Burton et al., 2015; Groß et al., 2015; Haarig et al., 2017a), laboratory studies (Miffre et al., 2016), AERONET observations (Müller et al., 2013; Shin et al., 2018), and modelling (Wiegner et al., 2009; Gasteiger et al., 2011). The use of Mie theory (spherical particles) gives values of zero. The range for modelling results is defined by the studies of Wiegner et al. (2009) (lower boundary, spheroids) and Gasteiger et al. (2011) (upper boundary, mixtures of irregularly shaped particles). The blue and red dashed lines show that field measurements can reveal high depolarisation ratios for biomass-burning smoke as well (Burton et al., 2015; Haarig et al., 2018).

The text in new Section 2 is: “The particle linear depolarisation ratio  $\delta$  as measured by depolarisation lidar is the ratio of the particle backscatter coefficients measured at planes of polarisation perpendicular and parallel to the plane of polarisation of the emitted laser light

(Gimmestad, 2008). Like the lidar ratio and the Ångström exponent, it is an intensive parameter that takes on characteristic values for different aerosol types (Burton et al., 2012). It is most sensitive to the shape of the scattering particles, i.e.  $\delta = 0$  for spherical scatterers (or those that appear spherical with respect to the considered wavelength) and increases with particle non-sphericity. Reliable measurements of  $\delta$  require careful instrument characterisation together with dedicated calibration efforts (Freudenthaler et al., 2009; Freudenthaler, 2016). Light-scattering by non-spherical particles such as mineral dust poses a great challenge for applications in atmospheric science as it cannot be described by Mie scattering. The problem has been addressed by introducing a variety of non-spherical model particles (Kahnert et al., 2014) that differ considerably in the capability to properly describe light depolarisation (specifically at the  $180^\circ$  backscatter direction crucial for lidar). Spheroids were found to be particularly versatile for this purpose as they allow for addressing different degrees of non-sphericity in mathematically simple expressions. A specific spheroid model is the one introduced by Dubovik et al. (2006). It has been developed for the analysis of AERONET sun photometer measurements, and thus, is optimised for passive remote sensing applications. It has been applied in the inversion of lidar data Veselovskii et al. (2010) and to retrieve lidars-specific parameters (Müller et al., 2010; Shin et al., 2018) even though it has not been designed to describe light scattering at  $180^\circ$  backscatter direction. Dubovik's spheroidal model features a defined aspect-ratio distribution which separates it from other applications of spheroidal models used for lidar applications (Wiegner et al., 2009; Gasteiger and Freudenthaler, 2014).

Figure 1 presents spectral particle linear depolarisation ratios from laboratory (Miffre et al., 2016) and field measurements (Tesché et al., 2009a; Burton et al., 2015; Groß et al., 2015; Haarig et al., 2017a) with lidar, the analysis of AERONET observations using the Dubovik model (Müller et al., 2010; Shin et al., 2018), and modelling using spheroids (Wiegner et al., 2009) and other irregularly shaped particles (Gasteiger et al., 2011) to mimic the light-scattering properties of mineral dust. The purpose of the figure is to provide some context on the range of particle linear depolarisation ratios for mineral dust as inferred from measurements and modelling. Field measurements performed in Morocco (Tesché et al., 2009a), at Barbados (Groß et al., 2015; Haarig et al., 2017a) or with research aircraft over the Caribbean and the Chihuahuan Desert (Burton et al., 2015) show values of  $\delta_d$  in the range from 0.22 to 0.38 at the common lidar wavelengths 355, 532, and 1064 nm. Laboratory measurements of Arizona Test Dust (Miffre et al., 2016) confirm the field measurements at 532nm and give a value of 0.35 at 355 nm which is about 0.1 larger than most field measurements at this wavelength. However, Miffre et al. (2016) investigated only two size distributions and did not consider particles with diameters larger than 800nm for their study. Figure 1 also gives  $\delta_\lambda$  as obtained from the inversion of AERONET sun photometer measurements using Dubovik's model (Müller et al., 2010; Shin et al., 2018). AERONET derives values at different wavelengths than the lidar observations, i.e. 440, 670, 870, and 1020 nm. In general, AERONET-derived  $\delta$  are closest to the lidar reference at the longest wavelength. The values at 440 nm are lower than the lidar observations at both 355 and 532 nm though a direct comparison is impossible due to the mismatch in the wavelengths of observations. For comparison, Figure 1 gives the results of modelling studies using Mie scattering ( $\delta_\lambda = 0$ ), a spheroid model with aspect ratios different from the one in the Dubovik model (Wiegner et al., 2009), and irregularly shaped particles (Gasteiger et al., 2011). The latter two options are considered here to open the range of modelling results (grey areas in Figure 1) of the light-scattering by non-spherical particles with specific focus on lidar

*application. The comparison shows that the AERONET-derived values using Dubovik's model are on the lower boundary of the values inferred using other particle geometries at wavelengths smaller than 800 nm. The large values observed with lidar can only be reproduced by Gasteiger et al. (2011). The aspect-ratio distribution characteristic for Dubovik's spheroidal model, though sufficient to reproduce laboratory measurements over a wide range of scattering angles (Dubovik et al., 2006), might hence be a limiting factor when it comes to lidar applications.*

*Mineral dust and volcanic ash were generally considered to be the aerosol types that show the highest values of  $\delta$  at the wavelength used in aerosol lidars. This would make it easy to detect their occurrence in a lidar measurement. However, recent case studies have shown that biomass-burning smoke can also show values as high as  $\delta = 0.20\text{--}0.25$  at 355 and 532 nm (Burton et al., 2015; Haarig et al., 2018; Hu et al., 2019). Two of the observed cases of highly depolarising smoke particles are also presented in Figure 1 as a contrast to the observed  $\delta$  spectra for mineral dust. Light-scattering simulations have shown that such values can be reproduced using spheroids of nearly spherical shape (with aspect ratios close to unity, Bi et al. 2018; Gialitaki et al. 2019) and agglomerates of spheroids (Mishchenko et al., 2016). In both cases, the model particles need to contain substantial amounts of non- or weakly absorbing material with an imaginary part of the refractive index below 0.01."*

2. For convenience of results discussion, I would suggest to add in the beginning a kind of a table (or figure), showing depolarization ratios, predicted by spheroid model for realistic PSD of dust for pure spheroids and for spheroids fraction 40%, 60%....It will help in the analysis of results.

The presentation of particle linear depolarisation ratios for realistic size distributions and different spheroid fractions is a very good suggestion. However, we believe that the effort involved to get meaningful results from such an approach would warrant a separate study entirely as it goes well beyond the scope of this paper. Instead, we have added the discussion of field and lab measurements of the particle linear depolarisation ratio as well as of modelling studies with focus on lidar applications in new Section 2 (see reply to previous comment). In any case, a sensitivity as suggested by the Referee has been presented by Veselovskii et al. (2010), i.e. in their Figures 8 and 14.

It is important to show depolarizations for different values of the imaginary part (mI). From my knowledge even pure spheroids have difficulty in reproducing high depolarization ratios, especially for high mI.

We have now added a detailed presentation of the different inversion results for the refractive index to Figures 3, 5, 8, 9, and a new Figure 10. The issue addressed by the Referee has also been shown before by Veselovskii et al. (2010).

3. Authors assume spectrally independent the particle refractive index. In reality, in dust the imaginary part of the refractive index increases in UV, leading to fast decrease of depolarization ratio. This should be discussed.

The Referee is correct. We have added the following statement to Section 3.3 to clarify the setup of the inversion algorithm with respect to the refractive index: "*The inversion uses a single refractive index that is independent of particle size and wavelength.*"

Regarding the effect of this constraint, we have added the following paragraph top the discussion of the findings: *“The inversion assumes a spectrally independent complex refractive index. In contrast, mineral dust is known to show a strong increase in the imaginary part of the refractive index with smaller wavelengths. This issue has been explored by Veselovskii et al. (2010) who conclude that (i) the error of the volume concentration is estimated as 17% to 25% depending on the contribution of large particles and (ii) a fixed imaginary part refers to the mean value of the spectrally dependent imaginary part. A detailed investigation of the assumption of spectrally independent refractive indices is beyond the scope of this study.”*

We are afraid that an in-depth investigation of the effect of using a spectrally independent refractive index in the inversion of lidar data goes well beyond the scope of this study. In fact, this issue warrants its own dedicated study.

#### **Technical comments.**

p5, ln27: “This case represents nearly pure dust conditions...” It is worth to mention that this is long-transported dust, which can be modified during transportation.

The following statement has been added to the text: *“However, the dust arrived at Barbados after several days of long-range transport. Its bulk properties might have been modified during transport compared to freshly emitted dust.”*

p6, ln6: The inversion of all input data sets shows a decrease of effective radius with height” Why? If Angstrom and depolarization are stable...

We are sorry for showing only parts of the optical data set. We have now added plots of the lidar ratio and the Angstrom exponent to Figure 2 (former Figure 1). These show an increase of the lidar ratio and the extinction-related Angstrom exponent that is in line with a decrease of the effective radius.

p6, ln12: “In fact, non-spherical particle fractions were never found to exceed 40% when using the traditional 3+2 input” Inverse problem for 3+2 set is strongly underdetermined, so retrieved spheroid fraction is un-trustable. This is why usually 100% of spheroids is assumed.

Thank you for this comment. We have added a corresponding statement to the text: *“In fact, spheroid fractions were never found to exceed 40% when using the traditional 3+2 input regardless of the dust content in the mixed pollution plumes. A similar spheroid fraction of on average 35% has previously been reported for the inversion of 3+2 data sets obtained for Saharan dust (Veselovskii et al., 2010). The inverse problem for the 3+2 input data set is strongly under-determined, and thus, leads to untrustworthy spheroid fractions. This is why the inversion of 3+2 data has only been done for pure-dust conditions with the spheroid fraction set to 100% (Veselovskii et al., 2010).”*

p6, ln9: “The high values of  $\Delta_{532}$  lead to a dust fraction above 80% “ Here the table with predicted depolarizations would be useful.

We believe that such a table could be misleading as it would require the use of suitable size distributions in the light-scattering calculations. However, these are not known a priori and could change from case to case leading to further ambiguity. We therefore decided against the Referee’s suggestion. Please also see our replies to the first two comments.



What discrepancy did you obtain in retrievals?

We have now added the mean number of averaged solutions for the different input data sets together with the mean, median, and range of discrepancies related to the corresponding number of solutions to Table 2. The text has also been revised as outlined in the reply to the next comment.

Fig. 2: Why not to show retrieved real and imaginary parts? Error bars should be added.

We have now added profiles of the real and imaginary parts to the case studies in Figures 3 (former Figure 2) and 5 (former Figure 5) as well as to the correlation plots in Figures 8 and 9 (former Figures 7 and 8). In addition, we have added a new Figure 10 that presents the connection between the real and imaginary part of the refractive index and the dust ratio. We have refrained from adding error bars to the figures as they make it much harder to extract information from the figures. An example of what Figure 3 would look like with error bars for just two data sets (i.e. no depolarization input and triple-depolarization input) is shown below. However, we have added the median errors for the retrieved parameters for the respective input data sets to Table 2. A description of how these error bars have been derived has been added to Section 3.2: *“In the inversion algorithm, the obtained microphysical properties are used to re-calculate the input parameter and to assess the discrepancy between the original input data and the optical data set that would be obtained from the retrieved microphysical properties. In the analysis of the inversion calculations, we have averaged those 140 to 200 solutions (median value of 160 for the different input data sets) that revealed the smallest discrepancy to the optical input data. The mean and median discrepancies found from this approach for the different input data sets are shown in Table 2 together with the range of derived values. In general, median discrepancy increased with increasing number of input data from 1 (no depolarisation input) over 7-11 (one depolarisation input) and 13-17 (two depolarisation inputs) to 22 (three depolarisation inputs). The error of the respective parameters have been obtained as one standard deviation of averaging over the number of accepted solutions. The absolute errors presented in Table 2 refer to the median of all the error values for a respective input data set.”*

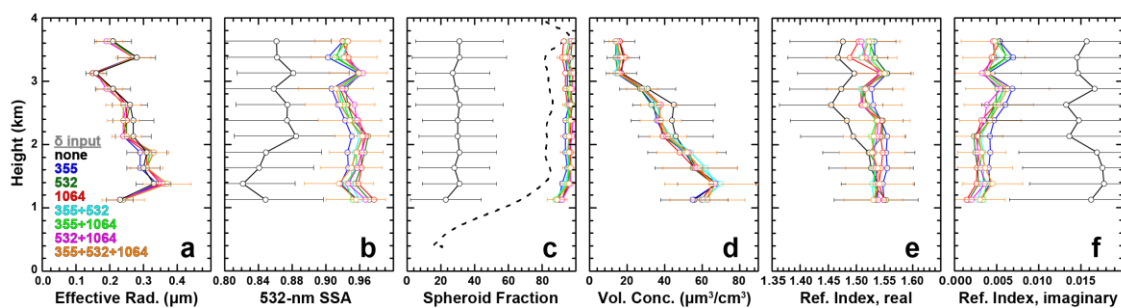

**Figure 3:** Inversion results of (a) effective radius, (b) 532-nm SSA, (c) spheroid fraction, and (d) volume concentration, and (e) real and (f) imaginary part of the refractive index for eight inversion runs with varying depolarisation-ratio input (colours, see also Table 2) using the input data presented in Figure 2. The dashed line in the plot of the non-spherical fraction refers to the contribution of dust to the 532-nm backscatter coefficient that can be obtained according to the procedure described by Tesche et al. (2009b). Error bars have been for results obtained from the inversion of the data sets without and with triple depolarization input, respectively.

p11, ln18: “The most realistic non-spherical fractions is found when using depolarization information at 355 nm.” Have you any explanation for this?



At the moments, we have no explanation for this. It seems particularly surprising in light of the fact that depolarisation ratios inferred at small wavelengths using the Dubovik model show the largest discrepancy compared to lidar measurements (see new Figure 1).

### Anonymous Referee #3

This work is valuable since it discusses the most useful depolarization input for retrieving dust properties from lidar measurements using the spheroid model of Dubovik et al. (2006). The Dubovik model was generated for retrieving dust microphysical properties with passive remote sensing, but it has been extensively used for dust retrievals with lidars. A discussion relevant on the Dubovik model capabilities and limitations for dust retrievals using lidar measurements is missing from the literature. Although the work in discussion does not extensively do this, it opens a discussion for the most useful input in terms of depolarization at 355, 532 and 1064 nm.

We have added a new Section 2: *Spectral  $\delta$  for mineral dust from measurements and modelling* and a new Figure 1 to provide a better overview over field and lab measurements of spectral particle linear depolarisation ratios as well as findings from modelling using spheroids and irregularly shaped particles. The purpose of this now section is also to put the results presented in our study into a broader context of dust remote sensing.

New Figure 1 looks like this:

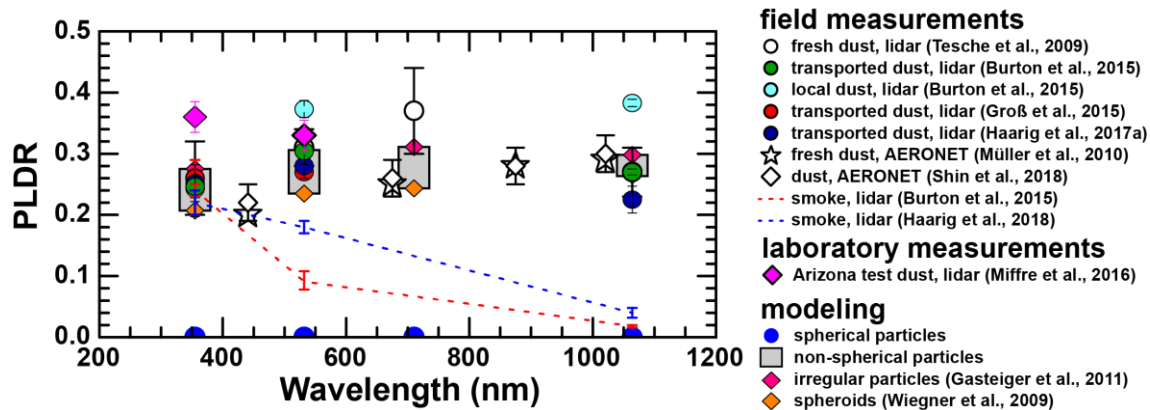

**Figure 1:** Overview of particle linear depolarisation ratios for pure mineral dust from field measurements (Tesche et al., 2009a; Burton et al., 2015; Groß et al., 2015; Haarig et al., 2017a), laboratory studies (Miffre et al., 2016), AERONET observations (Müller et al., 2013; Shin et al., 2018), and modelling (Wiegner et al., 2009; Gasteiger et al., 2011). The use of Mie theory (spherical particles) gives values of zero. The range for modelling results is defined by the studies of Wiegner et al. (2009) (lower boundary, spheroids) and Gasteiger et al. (2011) (upper boundary, mixtures of irregularly shaped particles). The blue and red dashed lines show that field measurements can reveal high depolarisation ratios for biomass-burning smoke as well (Burton et al., 2015; Haarig et al., 2018).

The text in new Section 2 is: “The particle linear depolarisation ratio  $\delta$  as measured by depolarisation lidar is the ratio of the particle backscatter coefficients measured at planes of polarisation perpendicular and parallel to the plane of polarisation of the emitted laser light (Gimmestad, 2008). Like the lidar ratio and the Ångström exponent, it is an intensive parameter that takes on characteristic values for different aerosol types (Burton et al., 2012). It is most sensitive to the shape of the scattering particles, i.e.  $\delta = 0$  for spherical scatterers (or those that appear spherical with respect to the considered wavelength) and increases with particle non-sphericity. Reliable measurements of  $\delta$  require careful instrument characterisation together with dedicated calibration efforts (Freudenthaler et al., 2009; Freudenthaler, 2016). Light-scattering by non-spherical particles such as mineral dust poses

a great challenge for applications in atmospheric science as it cannot be described by Mie scattering. The problem has been addressed by introducing a variety of non-spherical model particles (Kahnert et al., 2014) that differ considerably in the capability to properly describe light depolarisation (specifically at the  $180^\circ$  backscatter direction crucial for lidar). Spheroids were found to be particularly versatile for this purpose as they allow for addressing different degrees of non-sphericity in mathematically simple expressions. A specific spheroid model is the one introduced by Dubovik et al. (2006). It has been developed for the analysis of AERONET sun photometer measurements, and thus, is optimised for passive remote sensing applications. It has been applied in the inversion of lidar data Veselovskii et al. (2010) and to retrieve lidars-specific parameters (Müller et al., 2010; Shin et al., 2018) even though it has not been designed to describe light scattering at  $180^\circ$  backscatter direction. Dubovik's spheroidal model features a defined aspect-ratio distribution which separates it from other applications of spheroidal models used for lidar applications (Wiegner et al., 2009; Gasteiger and Freudenthaler, 2014).

Figure 1 presents spectral particle linear depolarisation ratios from laboratory (Miffre et al., 2016) and field measurements (Tesche et al., 2009a; Burton et al., 2015; Groß et al., 2015; Haarig et al., 2017a) with lidar, the analysis of AERONET observations using the Dubovik model (Müller et al., 2010; Shin et al., 2018), and modelling using spheroids (Wiegner et al., 2009) and other irregularly shaped particles (Gasteiger et al., 2011) to mimic the light-scattering properties of mineral dust. The purpose of the figure is to provide some context on the range of particle linear depolarisation ratios for mineral dust as inferred from measurements and modelling. Field measurements performed in Morocco (Tesche et al., 2009a), at Barbados (Groß et al., 2015; Haarig et al., 2017a) or with research aircraft over the Caribbean and the Chihuahuan Desert (Burton et al., 2015) show values of  $\delta_d$  in the range from 0.22 to 0.38 at the common lidar wavelengths 355, 532, and 1064 nm. Laboratory measurements of Arizona Test Dust (Miffre et al., 2016) confirm the field measurements at 532nm and give a value of 0.35 at 355 nm which is about 0.1 larger than most field measurements at this wavelength. However, Miffre et al. (2016) investigated only two size distributions and did not consider particles with diameters larger than 800nm for their study. Figure 1 also gives  $\delta_\lambda$  as obtained from the inversion of AERONET sun photometer measurements using Dubovik's model (Müller et al., 2010; Shin et al., 2018). AERONET derives values at different wavelengths than the lidar observations, i.e. 440, 670, 870, and 1020 nm. In general, AERONET-derived  $\delta$  are closest to the lidar reference at the longest wavelength. The values at 440 nm are lower than the lidar observations at both 355 and 532 nm though a direct comparison is impossible due to the mismatch in the wavelengths of observations. For comparison, Figure 1 gives the results of modelling studies using Mie scattering ( $\delta_\lambda = 0$ ), a spheroid model with aspect ratios different from the one in the Dubovik model (Wiegner et al., 2009), and irregularly shaped particles (Gasteiger et al., 2011). The latter two options are considered here to open the range of modelling results (grey areas in Figure 1) of the light-scattering by non-spherical particles with specific focus on lidar application. The comparison shows that the AERONET-derived values using Dubovik's model are on the lower boundary of the values inferred using other particle geometries at wavelengths smaller than 800 nm. The large values observed with lidar can only be reproduced by Gasteiger et al. (2011). The aspect-ratio distribution characteristic for Dubovik's spheroidal model, though sufficient to reproduce laboratory measurements over a wide range of scattering angles (Dubovik et al., 2006), might hence be a limiting factor when it comes to lidar applications.

*Mineral dust and volcanic ash were generally considered to be the aerosol types that show the highest values of  $\delta$  at the wavelength used in aerosol lidars. This would make it easy to detect their occurrence in a lidar measurement. However, recent case studies have shown that biomass-burning smoke can also show values as high as  $\delta = 0.20\text{--}0.25$  at 355 and 532 nm (Burton et al., 2015; Haarig et al., 2018; Hu et al., 2019). Two of the observed cases of highly depolarising smoke particles are also presented in Figure 1 as a contrast to the observed  $\delta$  spectra for mineral dust. Light-scattering simulations have shown that such values can be reproduced using spheroids of nearly spherical shape (with aspect ratios close to unity, Bi et al. 2018; Gialitaki et al. 2019) and agglomerates of spheroids (Mishchenko et al., 2016). In both cases, the model particles need to contain substantial amounts of non- or weakly absorbing material with an imaginary part of the refractive index below 0.01.”*

Unfortunately the paper is very confusing since the authors present their results as if they consider a universal spheroid model. The spheroid model of Dubovik et al. (2006) cannot be considered as a universal spheroid model, due to the assumption used for the aspect ratio distribution and the mixture of prolate and oblate spheroids. This is discussed in Dubovik et al. (2006), showing that the values of P22/P11 (i.e. the phase matrix elements relevant to depolarization) can be different for different aspect ratio distributions (see Fig. 12 in Dubovik et al. (2006); the values at 180 degrees are not shown but from the scattering angles up to  $\sim 170$  degrees the tendency is clear). Dubovik et al. state in page 15 of their paper that: "Figure 12 illustrates the phase matrices simulated for desert dust aerosol using an ensemble of spheroids differing only by their axis ratio distributions. .... Some differences can be seen for ... P22/P11, however they are likely to be insignificant for passive remote sensing applications."

We would like to thank the Referee for these very constructive comments. Throughout the manuscript we are now emphasising that a specific version of spheroid model is being applied in our study. We hope that we can avoid the impression of providing too general conclusions this way.

This is most probably the reason the results of the work in discussion are different from results shown in Gasteiger and Freudenthaler (2014), who assumed the spheroidal shape for non-spherical particles, but assumed different aspect ratios and mixture of prolate and oblate particles, than the Dubovik model.

We have revised the discussion of the differences between our findings and the ones of Gasteiger and Freudenthaler (2014) for a better emphasis of the differences between the applied models. The revised text in the discussion section now reads: “*The results we obtain from our study are somewhat contradictory to the findings of Gasteiger and Freudenthaler (2014) and Shin et al. (2018) who attribute the greatest informational value and representativeness to observations of  $\delta_{1064}$ . This is likely due to the difference in the setup of the different studies. On the one hand, Gasteiger and Freudenthaler (2014) applied a spheroid model that was constrained in neither the aspect ratio nor the oblate-to-prolate ratio of the spheroids. On the other hand, Shin et al. (2018) are referring to AERONET data which have been derived for scattering angles smaller than  $180^\circ$  (and extrapolated to the backscatter direction) and represent values for the entire atmospheric column. However, the strong and weak effects of using  $\delta_{355}$  and  $\delta_{1064}$ , respectively, in the inversion of lidar measurements of dust-containing aerosol layers based on the spheroid model of Dubovik et al. (2006) also indicate that the model’s constraints on the aspect-ratio distribution and the ratio of oblates*

*to prolates have a strong effect on making full use of the informational content provided at different wavelenths in lidar applications. We stress again that the conclusions of this study are valid only for the inversion of lidar data that resorts to describe the light-scattering properties of non-spherical dust particles by means of the spheroid model of Dubovik et al. (2006) and that any finding might be strongly related to the weaknesses of this particular light-scattering model (Müller et al., 2010, 2013). Nevertheless, no other model has been applied as widely in the inversion of lidar data (Veselovskii et al., 2010; Di Girolamo et al., 2012; Papayannis et al., 2012; Müller et al., 2013). In addition, there has so far been no systematic investigation of the usefulness of different depolarisation input for this particular inversion setup. We therefore believe that this work will contribute to a better understanding of the usefulness and limitations of the model of Dubovik et al. (2006) in lidar applications as well as to further emphasise the need for a more general model to describe light-scattering by non-spherical particles at very large scattering angles.*

*Following on the initial work of Veselovskii et al. (2010), we have performed the first systematic investigation of the effect of all possible combinations of depolarization-related inversion input at the wavelengths of 355, 532, and 1064nm on the retrieved aerosol microphysical properties. The aim of this study is to assess the performance of the inversion procedure to lidar measurements conducted in the presence of mixture of spherical and non-spherical particles. So far, inversions on the presence of mineral dust have only been attempted if pure-dust conditions could be assumed (Veselovskii et al., 2010; Di Girolamo et al., 2012) or of the contribution of the non-spherical scatterers had been screened from the optical input data (Tesche et al., 2011a, b)."*

In conclusion, although the work in discussion can be a valuable tool for dust lidar retrievals, it should undergo major revisions before it is published in AMT. Specifically, the authors should shift its objective to discuss what their results are actually about, starting with changing the title to something similar to: "What are the most useful de-polarization input for retrieving the microphysical properties of dust particles from lidar measurements using the spheroid model of Dubovik et al. (2006)". Please revise the whole manuscript accordingly.

The title has been changed as suggested. We have also added comments throughout the text that we are not using a universal spheroid model but the rather specific version of *Dubovik et al. (2006)*.

Last, please note that the focus of the work is on dust particles and not on "non-spherical particles" in general. Moreover

(a) change the retrieved "non-spherical fraction" to "spheroid fraction" throughout the document,

The suggested changes have been made in the text and the figures.

(b) include plots of the retrieved real and imaginary part of the refractive index in the results section and

The suggested plots of the real and imaginary part of the refractive index have been added to Figures 3, 5, 8, and 9 (former Figures 2, 4, 7, and 8). In addition, we have added a new Figure 10 that shows the connection between the real and imaginary part of the refractive index and the dust ratio.



The description of Figure 10 is “The dependence of the retrieved real and imaginary parts of the refractive index on the dust ratio is shown in Figure 10. The upper plot shows that the retrieved real parts cover a large range of values for dust ratios smaller than 60% with data sets that include  $\delta_{355}$  generally giving lower values (3+2+3 gives the lowest values) than data sets that exclude  $\delta_{355}$ . The range of results narrows for larger dust ratios for all inversion inputs that include depolarisation information. Only the traditional 3+2 data set gives values smaller than 1.50 for dust ratios larger than 60%. A reversed behaviour is found for the imaginary part of the refractive index in Figure 10b. Data sets that include  $\delta_{355}$  generally give larger values than those that exclude  $\delta_{355}$  with the traditional 3+2 data set leading to by far the highest values. This holds particularly for dust ratios larger than 60% for which the range of results from all other input data sets narrows in the same way as found for the real part.”

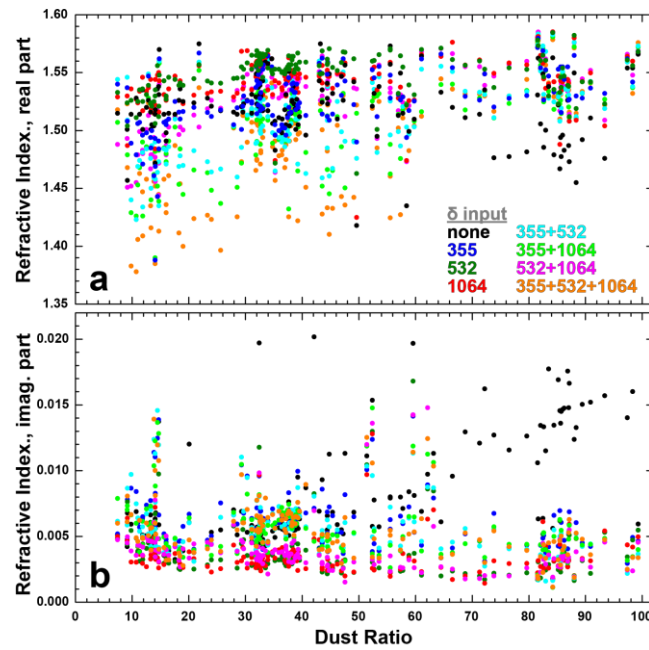

**Figure 1:** Connection between the retrieved (a) real and (b) imaginary parts of the refractive index and the dust ratio for the different input data sets.

We have also revised the discussion to account for the findings for the refractive index in more detail: “The inversion assumes a spectrally independent complex refractive index. In contrast, mineral dust is known to show a strong increase in the imaginary part of the refractive index with smaller wavelengths. This issue has been explored by Veselovskii et al. (2010) who conclude that (i) the error of the volume concentration is estimated as 17% to 25% depending on the contribution of large particles and (ii) the spectrally independent imaginary part refers to the mean value of the spectrally dependent imaginary part. A detailed investigation of the assumption of spectrally independent refractive indices is beyond the scope of this study.”

(c) provide a more extensive discussion on the effect of the assumption of spectrally-independent refractive index used in the analysis.

The same point has been made by Referee #2. We have added the following statement to Section 3.2 to clarify the setup of the inversion algorithm with respect to the refractive index:

*“The inversion uses a single refractive index that is independent of particle size and wavelength.”*

Regarding the effect of this constraint, we have added the following paragraph top the discussion of the findings: *“The inversion assumes a spectrally independent complex refractive index. In contrast, mineral dust is known to show a strong increase in the imaginary part of the refractive index with smaller wavelengths. This issue has been explored by Veselovskii et al. (2010) who conclude that (i) the error of the volume concentration is estimated as 17% to 25% depending on the contribution of large particles and (ii) a fixed imaginary part refers to the mean value of the mean value of the spectrally dependent imaginary part. A detailed investigation of the assumption of spectrally independent refractive indices is beyond the scope of this study.”*

### Added References:

- Bi, L., Lin, W., Liu, D., and Zhang, K.: Assessing the depolarization capabilities of nonspherical particles in a super-ellipsoidal shape space, *Opt. Expr.*, 26, 1726-1742, <https://doi.org/10.1364/OE.26.001726>, 2018.
- Freudenthaler, V.: About the effects of polarising optics on lidar signals and the  $\Delta 90$  calibration, *Atmos. Meas. Tech.*, 9, 4181-4255, <https://doi.org/10.5194/amt-9-4181-2016>, 2016.
- Gialitaki, A., Tsekeri, A., Amiridis, V., Marinou, E., Haarig, M., Baars, H., and Ansmann, A.: Interpreting the Particle Linear Depolarization Ratio spectral dependence of aged stratospheric smoke using T-matrix simulations, *Geophysical Research Abstracts*, Vol. 21, EGU2019-1678, 2019 EGU General Assembly, 2019.
- Groß, S., Freudenthaler, V., Schepanski, K., Toledano, C., Schäfler, A., Ansmann, A., and Weinzierl, B.: Optical properties of long-range transported Saharan dust over Barbados as measured by dual-wavelength depolarization Raman lidar measurements, *Atmos. Chem. Phys.*, 15, 11067-11080, <https://doi.org/10.5194/acp-15-11067-2015>, 2015.
- Kemppinen, O., Nousiainen, T., and Lindqvist, H.: The impact of surface roughness on scattering by realistically shaped wavelength-scale dust particles, *J. Quant. Spectrosc. Rad. Transf.*, 150, 55-67, <https://doi.org/10.1016/j.jqsrt.2014.05.024>, 2015a.
- Kemppinen, O., Nousiainen, T., and Jeong, G. Y.: Effects of dust particle internal structure on light scattering, *Atmos. Chem. Phys.*, 15, 12011–12027, <https://doi.org/10.5194/acp-15-12011-2015>, 2015b.
- Mamouri, R.-E. and Ansmann, A.: Fine and coarse dust separation with polarization lidar, *Atmos. Meas. Tech.*, 7, 3717-3735, <https://doi.org/10.5194/amt-7-3717-2014>, 2014.
- Miffre, A., Mehri, T., Francis, M., and Rairoux, P.: UV–VIS depolarization from Arizona Test Dust particles at exact backscattering angle, *J. Quant. Spectr. Rad. Trans.*, 169, 79-90, <https://doi.org/10.1016/j.jqsrt.2015.09.016>, 2016.
- Mishchenko, M. I., Dlugach, J. M., and Liu, L.: Linear depolarization of lidar returns by aged smoke particles, *Appl. Opt.*, 55, 9968-9973, <https://doi.org/10.1364/AO.55.009968>, 2016.
- Shin, S.-K., Tesche, M., Müller, D., and Noh, Y.: Technical note: Absorption aerosol optical depth components from AERONET observations of mixed dust plumes, *Atmos. Meas. Tech.*, 12, 607-618, <https://doi.org/10.5194/amt-12-607-2019>, 2019.
- Wiegner, M., Gasteiger, J., Kandler, K., Weinzierl, B., Rasp, K., Esselborn, M., Freudenthaler, V., Heese, B., Toledano, C., Tesche, M., and Althausen, D.: Numerical simulations of optical properties of Saharan dust aerosols with emphasis on lidar applications, *Tellus*, 61B, 180–194, 2009.

# 3+2+X: What is the most useful depolarisation input for retrieving microphysical properties of non-spherical particles from lidar measurements ~~by assuming spheroidal particle shapes using the spheroid model of Dubovik et al. (2006)?~~

Matthias Tesche<sup>1,2</sup>, Alexei Kolgotin<sup>3</sup>, Moritz Haarig<sup>4</sup>, Sharon P. Burton<sup>5</sup>, Richard A. Ferrare<sup>5</sup>, Chris A. Hostetler<sup>5</sup>, and Detlef Müller<sup>1</sup>

<sup>1</sup>School of Physics, Astronomy and Mathematics, University of Hertfordshire, Hatfield, United Kingdom

<sup>2</sup>now at Leipzig Institute for Meteorology (LIM), Leipzig University, Leipzig, Germany

<sup>3</sup>A. M. Prokhorov General Physics Institute, Moscow, Russia

<sup>4</sup>Leibniz Institute for Tropospheric Research (TROPOS), Leipzig, Germany

<sup>5</sup>NASA Langley Research Center, Hampton, USA

*Correspondence to:* Matthias Tesche (matthias.tesche@uni-leipzig.de)

**Abstract.** The typical multiwavelength aerosol lidar data set for inversion of optical to microphysical parameters is composed of three backscatter coefficients ( $\beta$ ) at 355, 532, and 1064 nm and two extinction coefficients ( $\alpha$ ) at 355 and 532 nm. This data combination is referred to as  $3\beta+2\alpha$  or 3+2 data set. This set of data is sufficient for retrieving some important microphysical particle parameters if the particles have spherical shape. Here, we investigate the effect of including the particle linear depolarisation ratio ( $\delta$ ) as a third input parameter ~~to~~ **for** the inversion of lidar data. The inversion algorithm is generally not used if measurements show values of  $\delta$  that exceed 0.10 at 532 nm, i.e. in the presence of non-spherical particles such as desert dust, volcanic ash, and under special circumstances biomass-burning smoke. We use experimental data collected with instruments that are capable of measuring  $\delta$  at all three lidar wavelengths with an inversion routine that ~~uses the theory of light scattering by randomly oriented spheroids~~ **applies the spheroidal light-scattering model of Dubovik et al. (2006) with a fixed axis-ratio distribution** to replicate scattering properties of non-spherical particles. **The inversion gives as additional output parameter the fraction of spheroids required to replicate the optical data.** This is the first systematic test of the effect of using all theoretically possible combinations of  $\delta$  taken at 355, 532, and 1064 nm as input in the lidar data inversion.

We find that depolarisation information at least at one wavelength already provides useful information ~~in~~ **for** the inversion of optical data ~~that describe light scattering by~~ **that have been collected in the presence of non-spherical mineral dust** particles.

However, any choice of  $\delta_\lambda$  will give lower values of the single-scattering albedo than the traditional 3+2 data set. We find that input data sets that include  $\delta_{355}$  give a ~~non-spherical~~ **spheroid** fraction that closely resembles the dust ratio we obtain from using  $\beta_{532}$  and  $\delta_{532}$  in a methodology applied in aerosol-type separation. The use of  $\delta_{355}$  in data sets of two or three  $\delta_\lambda$  reduces the **spheroid** fraction ~~of non-spherical particles~~ that is retrieved when using  $\delta_{532}$  and  $\delta_{1064}$ . Use of the latter two **parameters** without accounting for  $\delta_{355}$  generally leads to high **spheroid** fractions ~~of non-spherical particles~~ that we consider not trustworthy. The use of three  $\delta_\lambda$  instead of two  $\delta_\lambda$  including the constraint that one of these is measured at 355 nm does not

provide any advantage over using 3+2+ $\delta_{355}$  for the observations with varying contributions of mineral dust considered here. However, additional measurements at wavelength different from 355 nm would be desirable for application to a wider range of aerosol scenarios that may include non-spherical smoke particles that can have values of  $\delta_{355}$  that are indistinguishable from those found for mineral dust. We therefore conclude that — depending on measurement capability — the future standard input for inversion of lidar data taken in the presence of mineral dust particles and using the spheroid model of Dubovik *et al.* (2006) kernels might be 3+2+ $\delta_{355}$  or 3+2+ $\delta_{355}$ + $\delta_{532}$ .

## 1 Introduction

Over the past two decades, the inversion of multiwavelength aerosol lidar measurements for the retrieval of aerosol microphysical properties (Müller *et al.*, 1998, 1999a, b, 2001; Veselovskii *et al.*, 2002; Ansmann and Müller, 2005) matured to a stage that allows for automated and unattended data processing (Müller *et al.*, 2014). The methodology uses multiwavelength lidar measurements of aerosol backscatter and extinction coefficients (i.e. the availability of a  $3\beta+2\alpha$  input data set, also referred to as 3+2 data set) and the mathematically correct description of light scattering by small particles to solve the ill-posed inverse problem at hand (Ansmann and Müller, 2005). Mie theory is used for the mathematical description of light scattering by particles. By definition, this theory cannot be applied to describe light scattering by non-spherical particles. This constraint causes a problem, as aerosol types such as mineral dust or volcanic ash are of non-spherical shape.

The presence of such non-spherical particles in lidar measurements is identified by non-zero values of the particle linear depolarisation ratio ( $\delta$ , Gimmestad 2008). Spherical particles do not depolarize the emitted laser light, and thus, show values of  $\delta$  close to zero. depolarisation-ratio measurements with advanced lidars (Freudenthaler *et al.*, 2009) allow for the retrieval of the contribution of non-spherical particles to the measured intensive optical parameters (Tesche *et al.*, 2009b; Burton *et al.*, 2014), and thus allow for comprehensive aerosol-type characterization (Burton *et al.*, 2012; Groß *et al.*, 2013).

A data base for light scattering by ~~non-spherical particles~~ **spheroids** (Dubovik model, Dubovik *et al.* 2006) developed for the inversion of sun-photometer measurements within the framework of the Aerosol Robotic Network (AERONET, <https://aeronet.gsfc.nasa.gov>, Holben *et al.* 1998) has been implemented in the lidar data inversion algorithm used here. The first application of the Dubovik model to lidar measurements of mineral dust has been presented by Veselovskii *et al.* (2010), Di Girolamo *et al.* (2012), Papayannis *et al.* (2012), and Müller *et al.* (2013). Veselovskii *et al.* (2010) performed inversions with the ~~non-spherical~~ **spheroid** light-scattering data base on the basis of the traditional 3+2 input data set as well as **for** a 3+2+1 data set that uses  $\delta_{532}$  as additional input. The latter parameter can provide information on the contribution of mineral dust to the total aerosol optical properties. From the comparison of the inversion runs with the different input data sets, the authors conclude that using 3+2+1 provides no advantage over the conventional 3+2 input run in which the ~~non-spherical~~ **spheroid** fraction is set a priori to 100%. They attribute this insensitivity (with regard to the use of  $\delta_{532}$ ) to the fact that (i) the Dubovik model has not been specifically designed for lidar applications, i.e. the mathematical description of light scattering at  $180^\circ$ , and (ii) that high values of  $\delta_{532}$  can only be obtained for values of particle refractive indices that are below values found from atmospheric observations (Veselovskii *et al.*, 2010). Papayannis *et al.* (2012) present results of the inversion of 3+2 data in the presence of mineral dust



while *Di Girolamo et al.* (2012) and *Müller et al.* (2013) used 3+2+1 data sets with depolarisation information at 355 nm and 532 nm, respectively. *Veselovskii et al.* (2016) present results of the inversion of lidar data for mineral dust for the case of the conventional 3+2 input (with ~~non-spherical~~ **spheroid** fraction set to 100%) and the 3+2+1 input with depolarisation information at 532 nm. The authors conclude that it is currently not possible to come to a definitive conclusion as to which input data set leads to a more accurate estimation of dust parameters. Instead, they recommend to use the 3+2 input for measurements of pure dust as these inversions provide more realistic estimations of the refractive index of dust particles. ~~Because s~~Scattering kernels based on Mie theory cannot represent light scattering by non-spherical particles, i.e. particles that **lead to increased  $\delta_\lambda$  in a lidar measurement.**, ~~another~~ **A way to circumvent this problem is to split the optical input according to the information related to spherical and non-spherical particles. The data obtained in that way can subsequently be used**

5 **to run the inversion considering only spherical scatterers (i.e. Mie kernels) and non-spherical scatterers (i.e. spheroid kernels), respectively. We provide a detailed discussion of this aspect in Section 3.3. However, the aim of this work is to gain insight into the performance of the inversion using Dubovik’s model for mixed dust cases as such scenarios have not yet been considered in earlier studies.**

On the one hand, the answer to the question **on what of which** inversion input provides the most accurate estimate of dust microphysical parameters requires independent measurements of these parameters. An example for such a study is presented by *Müller et al.* (2013). However, the comprehensive data sets required for such an effort can only be obtained in the framework of dedicated and extensive experiments. On the other hand, there has yet been no systematic estimation of the effect of using different depolarisation input for the inversion of lidar data. Today, depolarisation-ratio profiling is most commonly performed at 532 nm. This explains the use of this wavelength in the studies of *Veselovskii et al.* (2010, 2016) and *Müller et al.* (2013).

15 This wavelength is also the only one for which comparisons of the algorithm performance **exist with regard to** ~~of~~ using the 3+2 and the 3+2+1 data set ~~exists~~. ~~For~~ **Setting** a future standard on depolarisation-ratio profiling ~~it is crucial~~ **requires us** to assess which wavelength provides the best prospects not only for aerosol characterization but also for using the added information as input to inversion runs. Most inversions that use the Dubovik model focused on pure-dust conditions. Values of  $\delta_{532}$  were similar to values observed close to dust source regions (*Freudenthaler et al.*, 2009). Such conditions warrant the use of the

20 3+2 data set with the ~~non-spherical~~ **spheroid** fraction set to 100%. It yet needs to be investigated if depolarisation information also allows for the successful retrieval of aerosol microphysical properties in mixed layers of mineral dust and other spherical aerosol types, i.e. aerosol scenarios that are common ~~for~~ **during** observations of long-range transport of mineral dust in the free troposphere. Finally, the latest developments of realizing depolarisation-ratio profiling at 1064 nm or multiple wavelengths (*Burton et al.*, 2015; *Haarig et al.*, 2017a) leads to the question if these new measurement capabilities might also advance the

25 quality of the inversion of lidar measurements in the presence of non-spherical particles.

In this study, we investigate the effect of using  $\delta$  at 355, 532, and 1064 nm as additional inversion input to answer the question:

*What is the optimum choice of  $\delta_\lambda$  in the inversion of lidar measurements of non-spherical particles described by randomly oriented spheroids using the spheroid model of Dubovik et al. (2006)?*

We address this question **by using** ~~with the use of~~ 3+2+3 multiwavelength lidar measurements taken under both pure and mixed-dust conditions. Specifically, we assume that values of  $\delta_\lambda$  are accurate within their respective measurement error and that the findings of **this our** studies are primarily related to the light-scattering model used in the inversion calculations. We ~~start the paper with~~ **Section 2 presents** an overview of **the literature on measurements and modelling of spectral particle**

5 **linear depolarisation ratios of mineral dust particles.** ~~†~~The data sources and inversion setup **are introduced** in Section 3. The results are presented and discussed in Sections 4 and 5, respectively. We close with a summary and our conclusions in Section 6.

## 2 Spectral $\delta$ for mineral dust from measurements and modelling

The particle linear depolarisation ratio  $\delta$  as measured by depolarisation lidar is the ratio of the particle backscatter

10 coefficients measured at planes of polarisation perpendicular and parallel to the plane of polarisation of the emitted laser light (*Gimmestad, 2008*). Like the lidar ratio and the Ångström exponent, it is an intensive parameter that takes on characteristic values for different aerosol types (*Burton et al., 2012*). It is most sensitive to the shape of the scattering particles, i.e.  $\delta = 0$  for spherical scatterers (or those that appear spherical with respect to the considered wavelength) and increases with particle non-sphericity. Reliable measurements of  $\delta$  require careful instrument characterisation

15 together with dedicated calibration efforts (*Freudenthaler et al., 2009; Freudenthaler, 2016*).

light scattering by non-spherical particles such as mineral dust poses a great challenge for applications in atmospheric science as it cannot be described by Mie scattering. The problem has been addressed by introducing a variety of non-spherical model particles (*Kahnert et al., 2014*) that differ considerably in the capability to properly describe light depolarisation (specifically at the  $180^\circ$  backscatter direction crucial for lidar). Spheroids were found to be particularly

20 versatile for this purpose as they allow for addressing different degrees of non-sphericity in mathematically simple expressions. A specific spheroid model is the one introduced by *Dubovik et al. (2006)*. It has been developed for the analysis of AERONET sun photometer measurements, and thus, is optimised for passive remote sensing applications. It has been applied in the inversion of lidar data *Veselovskii et al. (2010)* and to retrieve lidar-specific parameters (*Müller et al., 2010; Shin et al., 2018*) even though it has not been designed to describe light scattering at  $180^\circ$  backscatter direction.

25 *Dubovik's* spheroidal model features a defined aspect-ratio distribution which separates it from other applications of spheroidal models used for lidar applications (*Wiegner et al., 2009; Gasteiger and Freudenthaler, 2014*).

Figure 1 presents spectral particle linear depolarisation ratios obtained from laboratory (*Miffre et al., 2016*) and field measurements (*Tesche et al., 2009a; Burton et al., 2015; Groß et al., 2015; Haarig et al., 2017a*) with lidar, the analysis of AERONET observations using the Dubovik model (*Müller et al., 2010; Shin et al., 2018*), and modelling using spheroids

30 (*Wiegner et al., 2009*) and other irregularly shaped particles (*Gasteiger et al., 2011*) used to mimic the light-scattering properties of mineral dust. The purpose of the figure is to provide some context on the range of particle linear depolarisation ratios for mineral dust as inferred from measurements and modelling. Field measurements performed in Morocco (*Tesche et al., 2009a*), at Barbados (*Groß et al., 2015; Haarig et al., 2017a*) or with research aircraft over the

Caribbean and the Chihuahuan Desert (*Burton et al.*, 2015) show values of  $\delta_d$  in the range from 0.22 to 0.38 at the common lidar wavelengths 355, 532, and 1064 nm. Laboratory measurements of Arizona Test Dust (*Miffre et al.*, 2016) confirm the field measurements at 532 nm and give a value of 0.35 at 355 nm which is about 0.1 larger than what most field measurements show at this wavelength. However, *Miffre et al.* (2016) investigated only two size distributions and did not consider particles with diameters larger than 800 nm for their study. Figure 1 also gives  $\delta_\lambda$  as obtained from the inversion of AERONET sun photometer measurements using Dubovik’s model (*Müller et al.*, 2010; *Shin et al.*, 2018). AERONET derives values at wavelengths that differ from the lidar observations, i.e. 440, 670, 870, and 1020 nm. In general, AERONET-derived  $\delta$  are closest to the lidar reference at the longest wavelength. The values at 440 nm are lower than the lidar observations at both 355 and 532 nm though a direct comparison is impossible due to the mismatch in the wavelengths of observations. For comparison, Figure 1 gives the results of modelling studies using Mie scattering ( $\delta_\lambda = 0$ ), a spheroid model with aspect ratios and oblate-to-prolate ratios different from the ones used by the Dubovik model (*Wiegner et al.*, 2009), and irregularly shaped particles (*Gasteiger et al.*, 2011). The latter two options are considered here to illustrate the range of modelling results (grey areas in Figure 1) of the light scattering by non-spherical particles with specific focus on lidar application. The comparison shows that the AERONET-derived values using Dubovik’s model are on the lower boundary of the values inferred using other particle geometries at wavelengths smaller than 800 nm. The large values observed with lidar can only be reproduced by *Gasteiger et al.* (2011). The characteristics of Dubovik’s spheroidal model, though sufficient to reproduce laboratory measurements over a wide range of scattering angles (*Dubovik et al.*, 2006), might hence be a limiting factor when it comes to lidar applications.

Mineral dust and volcanic ash were generally considered to be the aerosol types that show the highest values of  $\delta$  at the wavelengths used in aerosol lidars. This would make it easy to detect their occurrence in a lidar measurement. However, recent case studies have shown that biomass-burning smoke can also show values as high as  $\delta = 0.20 - 0.25$  at 355 and 532 nm (*Burton et al.*, 2015; *Haarig et al.*, 2018; *Hu et al.*, 2019). Two of the observed cases of highly depolarising smoke particles are also presented in Figure 1 to show the a contrast to the observed  $\delta$  spectra for mineral dust. Light-scattering simulations have shown that such values can be reproduced using spheroids of nearly spherical shape (with aspect ratios close to unity, *Bi et al.* 2018; *Gialitaki et al.* 2019) and agglomerates of spheroids (*Mishchenko et al.*, 2016). In both cases, the model particles need to contain substantial amounts of non- or weakly absorbing material with an imaginary part of the refractive index below 0.01.

### 3 Data and methods

This section provides an overview of the lidar data used in this study, **different methodologies to estimate the contribution of non-spherical particles to the measured optical data**, as well as a brief description of the inversion procedure.

### 3.1 Lidar data

To date, few lidar instruments have the capability to measure ~~3+2+3 data-sets~~ **particle linear depolarisation ratios at three wavelengths simultaneously** and we refer to *Burton et al.* (2015), *Haarig et al.* (2017a), and *Hu et al.* (2019). Here, we use data of ~~(+)~~ the NASA Langley Research Center’s High Spectral Resolution Lidar 2 (HSRL-2) that has been operated aboard  
5 the NASA B-200 King Air aircraft in the framework of the DISCOVER-AQ project (<https://discover-aq.larc.nasa.gov/>) and ~~(2)~~ **data taken with** the Backscatter Extinction lidar-Ratio Temperature Humidity profiling Apparatus (BERTHA) of the Leibniz Institute for Tropospheric Research (TROPOS) ~~taken~~ during the Saharan Aerosol Long-range Transport and Aerosol-Cloud-Interaction Experiment (SALTRACE, *Weinzierl et al.* 2017).

HSRL-2 is the second-generation airborne HSRL developed at NASA Langley Research Center. It builds on the heritage  
10 of the HSRL-1 system (*Hair et al.*, 2008) but operates at the laser wavelengths of 355, 532, and 1064 nm. The 3+2+3 data collected with HSRL-2 allow for a comprehensive characterization of different aerosol types (*Burton et al.*, 2012) and the retrieval of microphysical particle properties (*Müller et al.*, 2014). Further details on the instrument can be found in *Müller et al.* (2014) and *Burton et al.* (2018).

DISCOVER-AQ measurements with HSRL-2 were screened for observations that showed elevated levels of  $\delta_{532}$ . The obser-  
15 vations were identified as dusty mix (*Burton et al.*, 2012) and include flights during DISCOVER-AQ California 2013 (2 cases), DISCOVER-AQ Texas 2013 (4 cases), and DISCOVER-AQ Colorado 2014 (3 cases). An overview of the DISCOVER-AQ measurement days considered here is given in Table 1. The optical input data for the inversion were obtained in the first step by averaging temporally over several minutes of measurements and in the second step by carrying out data averaging over height layers of 150 m.

20 3+2+3 measurements with TROPOS’ BERTHA lidar during SALTRACE are used to assess the performance of the different inversion input data sets in the presence of pure dust conditions. This test under pure dust conditions is needed as such a scenario was not encountered during DISCOVER-AQ.

While BERTHA had been used to characterize the optical properties of pure dust during the Saharan Mineral Dust Experiment (SAMUM, *Tesche et al.* 2009b), the capability of carrying out triple-wavelength  $\delta$  measurements with BERTHA has only  
25 recently been presented in *Haarig et al.* (2017a). So far, such measurements have been performed to characterize mineral dust (*Haarig et al.*, 2017a), marine aerosols (*Haarig et al.*, 2017b), and biomass-burning smoke (*Haarig et al.*, 2018). An overview of the SALTRACE measurement days considered here is given in Table 1.

### 3.2 Retrieval of dust fraction from optical data

The particle linear depolarisation ratio is an intensive aerosol property that can be applied for aerosol classification  
30 (*Burton et al.*, 2012; *Groß et al.*, 2013). Because of its sensitivity to particle shape, it can also be used to separate the contributions of spherical and non-spherical particles to the optical parameters measured with aerosol lidar (*Tesche et al.*, 2009b; *Burton et al.*, 2014) or sun photometer (*Shin et al.*, 2019). This approach generally assumes mixtures with a coarse-mode that is composed of mineral dust and a spherical fine-mode. *Tesche et al.* (2009b, 2011b) use measure-

ments of  $\delta_{532}$  together with threshold values representative for pure aerosol types to separate the contribution of dust and biomass-burning smoke to the optical properties measured with multiwavelength aerosol Raman lidar at Cape Verde. Their approach assumes an external mixture of two aerosol types. A generalised form of this method that covers a broader variety of aerosol mixtures has been presented by *Burton et al. (2014)* for measurements with HSRL-1. *Mamouri and Ansmann (2014, 2017)* have refined the aerosol-type separation further using a two-step approach that allows for the separation of contributions of coarse dust, fine dust, and a non-dust aerosol type, i.e. marine or continental aerosol.

In principle, these aerosol-type separation techniques can be used to obtain input data sets for the inversion of lidar data that represent the spherical and non-spherical particles in a mixed aerosol plume, respectively. The inversion could then be run with the conventional 3+2 input data set and the spheroid fraction (see Section 3.3) set to either 0% (i.e. Mie kernels) or 100%. In this study, however, we aim to test how the inversion performs if we use different combinations of additional depolarisation-ratio input that allows us to account for the contribution of non-spherical particles to the optical input data. We use the dust ratio, i.e. the ratio of dust-related to total backscatter coefficient at 532 nm, (i) as an estimate of the dust contribution and (ii) for comparing to the spheroid fraction inferred from the inversion. Dust ratios were either taken from the DISCOVER-AQ data base (these values have been derived according to *Burton et al. (2014)*), or calculated following *Tesche et al. (2009b)* (with  $\delta_d = 0.32$  and  $\delta_{nd} = 0.01$  to replicate the values from HSRL-2) and *Mamouri and Ansmann (2014, 2017)* ( $\delta_{dc} = 0.39$ ,  $\delta_{df} = 0.16$ , and  $\delta_{nd} = 0.02$  to obtain the contributions of fine and coarse dust). In the discussion of our findings, we will consider the dust ratio for the two-component (*Tesche et al., 2009b; Burton et al., 2014*) and tree-component (*Mamouri and Ansmann, 2014, 2017*) mixtures as lower and upper limit, respectively, of the likely dust contribution.

### 3.3 Inversion of lidar data

The inversion of multiwavelength lidar data is based on using light-scattering kernels that were computed on the basis of Mie theory (*Ansmann and Müller, 2005*). *Veselovskii et al. (2010)* were the first to investigate the possibility of using non-spherical spheroid scattering kernels computed for randomly oriented spheroids (*Dubovik et al., 2006*). This study and those of *Müller et al. (2013)* and *Veselovskii et al. (2016)* added the  $\delta$  at 532 nm to the input data. The information provided by  $\delta$  allows for retrieving the non-spherical spheroid particle fraction as an additional inversion output parameter. For instance, *Müller et al. (2013)* obtained non-spherical spheroid fractions close to 100% under conditions of pure Saharan dust as identified by  $\delta_{532} \geq 0.31$ .

Because depolarisation-ratio measurements at 532 nm are most common (*Pappalardo et al., 2014; Baars et al., 2016*), it will be the first choice of the new standard input for the lidar inversion using non-spherical spheroid kernels (*Veselovskii et al., 2010, 2016*). In this paper, we investigate if this input is sufficient for retrieving (some of) the microphysical parameters or if improved results can be obtained by adding depolarisation information at 355 and/or 1064 nm (*Gasteiger and Freudenthaler, 2014*).

Inversion calculations have been performed with eight base functions and by varying the minimum and maximum particle radius of the inversion window between 0.075 and 0.450  $\mu\text{m}$  and 0.1 and 10.0  $\mu\text{m}$ , respectively. **The inversion uses a single**



**refractive index that is independent of particle size and wavelength.** The real part of the refractive index was varied between 1.3 and 1.6 with steps of 0.05 while the imaginary part of the refractive index was set to cover a range from 0 to 0.03 in steps of 0.005. The ~~non-spherical~~ **spheroid** fraction was varied between 0% and 100% in steps of 10%. A ~~non-spherical~~ **spheroid** fraction of 100% means that calculations are performed using exclusively ~~non-spherical~~ **spheroid** kernels (i.e. the Dubovik model) while a value of 0% refers to using Mie kernels. This setup leads to a total of 3675 solutions per inversion run.

For the measurements listed in Table 1, inversion runs have been performed with depolarisation input ranging from zero to three wavelengths. We obtain eight runs per measurement height bin. An overview of the various combinations and the name of each data set is given in Table 2. The current standard input 3+2 data sets do not account for depolarisation information (Set I).

Standard inversion outputs are particle number, surface-area, and volume concentration, and effective radius derived from these parameters, complex refractive index, and single-scattering albedo (SSA). The inversion with spheroid kernels also provides us with an estimate of the contribution of spheroids to the values we obtain for each of the parameters. In the inversion algorithm, the obtained microphysical properties are used to re-calculate the input parameter and to assess the discrepancy between the original input data and the optical data set that are obtained from the retrieved microphysical properties. In the analysis of the inversion calculations, we have averaged those 140 to 200 solutions (median value of 160 for the different input data sets) that revealed the smallest discrepancy to the optical input data. The mean and median discrepancies found from this approach for the different input data sets are shown in Table 2 together with the range of derived values. In general, median discrepancy increased with increasing number of input data from 1 (no depolarisation input) over 7-11 (one depolarisation input) and 13-17 (two depolarisation inputs) to 22 (three depolarisation inputs). The error of the respective parameters have been obtained as one standard deviation by averaging over the number of accepted solutions. The absolute errors presented in Table 2 refer to the median of all the error values for a respective input data set.

~~Standard inversion outputs are particle number, surface, and volume concentration, effective radius derived from these parameters, complex refractive index, and single-scattering albedo (SSA). The inversion with spheroid kernels also provides us with an estimate of the contribution of non-spherical particles to the values we obtain for each of the parameters.~~

For the measurements listed in Table 1, inversion runs have been performed with depolarisation input ranging from zero to three wavelengths. We obtain eight runs per measurement height bin. An overview of the various combinations and the name of each data set is given in Table 2. The current standard input 3+2 data sets do not account for depolarisation information (Set I).

## 4 Results

We present selected measurement cases that illustrate the effect of the choice of inversion input data sets on the retrieved aerosol microphysical properties. These case studies describe scenarios of varying concentration of non-spherical particles. We then discuss the results for the entire data set outlined in Table 1.

## 4.1 Example: pure dust

A 3+2+3 measurement conducted with BERTHA on 20 June 2014 during SALTRACE, Barbados (*Haarig et al.*, 2017a; *Weinzierl et al.*, 2017) has been chosen. This case represents nearly pure dust conditions, i.e. a situation dominated by non-spherical particles, and has previously been described by *Mamouri and Ansmann* (2017). **However, the dust arrived at Barbados after several days of long-range transport. Its bulk properties might have been modified during transport compared to freshly emitted dust.** The profiles of  $\beta$ ,  $\alpha$ , and  $\delta$ , **lidar ratio, and Ångström exponents** are shown in Figure 2. High values of  $\delta$  of about 0.26 at 532 nm and 0.24 at 355 and 1064 nm and wavelength-independent values of  $\alpha$  (extinction-related Ångström exponent of zero, ~~not shown~~) and lidar ratios of 40 to 55 sr (~~not shown~~) are indicative of nearly pure dust conditions. Similar values were observed during SAMUM (*Tesche et al.*, 2009b, 2011a). The circles in the plots of the backscatter and extinction coefficients mark the data that were used as input for the inversion, i.e. 11 sets at 11 height levels between 1.0 and 4.0 km height. The mean  $\delta_{532}$  for this height range is 0.26. This value results in a dust fraction of 0.85 with regard to the backscatter coefficient at 532 nm, ~~according to~~ **when applying the aerosol-type separation method described by *Tesche et al.* (2009b) and using  $\delta_{532}$ -values of 0.32 and 0.01 for the dust and non-dust part of the external aerosol mixture, respectively.** While higher dust fractions would be desirable to properly represent pure-dust conditions (see, e.g. *Freudenthaler et al.* 2009), the general scarcity of suitable measurement data means that this is the "purest" 3+2+3 dust case available to us at the time of this study.

Figure 3 shows the results we obtained from the inversion of the eight depolarisation-related variations of input data (see Table 2). We show the results for the effective radius, the 532-nm SSA, the ~~non-spherical~~ **spheroid** fraction, and the volume concentration, **and the complex refractive index**. The inversion of all input data sets shows a decrease of effective radius and volume concentration with height **while the real part of the refractive index stays fairly constant**. Little difference is visible from the inversion results for these parameters ~~apart from the slight variation of Set I~~. We obtain a much clearer separation between the inversion results for Set I (the traditional 3+2 data set) and Sets II to VIII (which include depolarisation information) for the SSA, ~~and the non-spherical~~ **spheroid** fraction, **and the imaginary part of the complex refractive index**. The high values of  $\delta_{532}$  lead to a dust fraction above 80% (dashed line in Figure 3c). Unsurprisingly, Set I is the only one that does not result in a very large **spheroid** fraction ~~of non-spherical particles~~. In fact, ~~non-spherical particle~~ **spheroid** fractions were never found to exceed 40% when using the traditional 3+2 input regardless of the dust content in the mixed pollution plumes. A similar ~~non-spherical~~ **spheroid** fraction of on average 35% has previously been reported for the inversion of 3+2 data sets obtained for Saharan dust (*Veselovskii et al.*, 2010). **The inverse problem for the 3+2 input data set is strongly under-determined, and thus, leads to untrustworthy spheroid fractions. This is why the inversion of 3+2 data has only been done for pure-dust conditions with the spheroid fraction set to 100% (*Veselovskii et al.*, 2010).** The unrealistic values of ~~non-spherical~~ **spheroid** particles obtained for Set I coincide with SSA values of as low as 0.82 **and extremely high imaginary parts of the refractive index of 0.015 to 0.018.** These ~~at~~ **values of SSA (imaginary part) are** is much lower (**higher**) than the values we obtain for the other sets. SSA (**the imaginary part**) is slightly lower (**higher**) for measurement cases **input data** that include  $\delta_{355}$  (Sets II, V, VI, and VIII), compared to ~~eases~~ **those** that do not include depolarisation information at 355 nm

(Sets III, IV, and VII). Overall, **all** input data sets that include depolarisation information give similar output data for the case of pure dust conditions **while the traditional 3+2 data set gives dramatically different results regarding the absorbing properties of the aerosols, i.e. imaginary part of the refractive index and SSA.**

## 4.2 Example: mixed dust

5 Figure 4 shows a measurement taken with HSRL-2 on 25 September 2013 in the framework of DISCOVER-AQ Texas. The data present the average of eight minutes of measurement time, i.e. between 2057 and 2105 UTC. This measurement case provides more insight on the sensitivity of data products on optical input data that were taken under mixed dust conditions, i.e. a situation in which mineral dust is mixed with spherical particles and depolarisation values are below the ones generally observed for pure dust. The column aerosol load during this measurement was rather low as indicated by an aerosol optical  
10 thickness (AOT) of 0.16 at 532 nm (see Table 1).

The 3+2+3 profiles in Figure 4 show aerosols in a well-mixed layer up to a height of 2.4 km. The mean value of  $\delta_{532}$  is 0.099. This number translates to a dust mixing ratio of 0.346 (Table 1, *Burton et al.* (2012)). The strong wavelength dependence of the backscatter and extinction coefficients suggests the presence of small particles caused by combustion processes. The Houston area is influenced by oil industry and high volume of traffic. The increased values of  $\delta_{532}$  are an indicator for the  
15 presence of mineral dust. Consequently, dusty mix and urban/pollution were identified as most abundant aerosol types during the measurement (*Burton et al.*, 2012). However, Figure 4 also shows a strong wavelength dependence of the values of  $\delta_{\lambda}$ , i.e. we find lower (higher) values at 355 nm (1064 nm) compared to 532 nm. This indicates that the choice of wavelength of the depolarisation ratio could potentially influence the retrieval.

Figure 5 shows the result of the inversion of the optical data represented by the coloured circles in Figure 4. As for the  
20 case of pure dust, the volume-concentration profile follows the shape (profile) of the extensive parameters, i.e. backscatter and extinction coefficient. The lowest values of volume concentration are obtained for the case in which  $\delta_{532}$  is used as additional information in data inversion. The highest values are found for inversions that make use of the full set of  $\delta_{\lambda}$ , i.e. the 3+2+3 data set. Taking into consideration the profiles from all eight inversion runs, however, reveals that the choice of depolarisation input seems to have no major effect on particle volume concentration – particularly not on the shape of the profile. In fact, we  
25 find comparably small differences of the values of volume concentration for the different input data sets that are defined by a variable number of depolarisation information.

In contrast, the use of a different number of depolarisation information results in a much stronger spread of the ~~non-spherical~~ **spheroid** fraction. If we use no depolarisation information we obtain spheroid fractions that vary between 20% and 30% and change erratically from height bin to height bin. The sets III, IV, and VII (i.e. those with  $\delta_{532}$ ,  $\delta_{1064}$ , and  $\delta_{532} + \delta_{1064}$ ) result  
30 in rather high ~~non-spherical~~ **spheroid** fractions between 75% and 90%. This result seems to be a clear overestimate as such conditions would refer to the dominance of mineral dust. This predominance is in disagreement with the dust fraction presented in Figure 4. The most plausible spheroid fractions of around 40% combined with strong vertical homogeneity are found for input data sets that contain  $\delta_{355}$ , i.e. sets II, V, VI, and VIII. These values are also closest to the mean dust ratio of 0.35 that

has been determined from the optical data (see Table 1). The profile **Those spheroid fractions** follows the profile of the dust ratio (dashed line in Figure 5) quite closely.

The separation of the results for different input data can also be seen in the profiles of **the 532-nm SSA at 532-nm and the refractive index in**—see Figure 5b. Data sets that show higher **non-spherical spheroid** fractions also coincide with SSA values that are up to 0.02 higher than values obtained from optical data sets that include information on  $\delta_{355}$ . **This is because the former data sets give higher real parts and lower imaginary parts of the refractive index than the latter.** This study mainly targets the comparison of results we obtain from using different combinations of depolarisation information **as input.** **For the second example case, w**We consider the **lower** values of the **non-spherical spheroid** fraction more realistic, and **hence**, consider data sets that use  $\delta_{355}$  as more trustworthy than data sets that do not include depolarisation information at 355 nm.

### 4.3 General findings

Figure 6 presents two cases for which the choice of depolarisation input has a profound effect on the retrieved **non-spherical spheroid** fraction. In the case of 13 July 2014, the steady decrease of  $\delta_\lambda$  with height translates to a similar decrease of the **non-spherical spheroid** fraction, but only for data sets that include  $\delta_{355}$ . In fact, this decrease closely follows the decrease of dust fraction with height. As for the previous cases, no variation with height is found when using the traditional 3+2 data set. Sets III, IV, and VII, all of which are lacking depolarisation information at 355 nm, do not result in **non-spherical spheroid** fractions smaller than 80%. The case of 17 July 2014 is even more striking as – in contrast to the previous examples –  $\delta$  is low at all wavelengths and the dust fraction obtained from the optical data is actually zero. Despite this clear pattern of the optical data, the inversion of the different input data sets gives a wide range of **non-spherical spheroid** fractions: below 20% for Sets II, V, VI, and VIII; slightly higher values of up to 30% in the lower half of the aerosol layer for Set I; values between 40% and 70% for Sets III and VII; and more than 70% for Set IV. This outcome suggests that using  $\delta_{1064}$  does not improve the performance of our particular inversion method using the spheroid Dubovik model. This result is in contrast to the results presented by *Gasteiger and Freudenthaler (2014)*. While  $\delta_{1064}$  certainly does provide additional information content, this cannot be exploited when combining the Dubovik model with the inversion algorithm used in this study.

A more complete picture of the effect of the choice of  $\delta_\lambda$  on the retrieved **non-spherical spheroid** fraction is provided in Figure 7. The figure includes all 156 data points obtained from the cases listed in Table 1. The results we obtain from the eight inversion runs is split according to data sets that include, respectively do not include  $\delta_{355}$ . As in the case of the examples shown before, we consider the retrieved **non-spherical spheroid** fraction as the microphysical manifestation of the optically-derived dust ratio (*Tesche et al., 2009b*). Figure 7 clearly shows that only input data sets that include  $\delta_{355}$  lead to any meaningful correlation between dust ratio and **non-spherical spheroid** fraction. The parameters of the linear regressions presented in Figure 7 are listed in the bottom half of Table 2. The steepest slope and largest values of the squared correlation coefficients are found for Sets V and VIII, i.e. the sets that either use input values for  $\delta_\lambda$  at 355 and 532 nm or all  $3\delta_\lambda$ , respectively. Figure 7b confirms that (i) **non-spherical spheroid** fractions above 40% are impossible to obtain from traditional 3+2 data sets, (ii) the data sets with  $\delta_{1064}$  give **non-spherical spheroid** fractions that are poorly correlated to the obtained dust ratios, and (iii) data

sets that include  $\delta_{532}$  but not  $\delta_{355}$  result in increased non-spherical **spheroid** fractions that increase with increasing dust ratio but rarely stay below 40%. We therefore conclude from Figure 7 that **in the case of using the spheroid model of Dubovik et al. (2006) to describe light scattering by non-spherical particles in the inversion of lidar**,  $\delta_{355}$  has a regulating effect on the inversion output and that data sets that include  $\delta_{355}$  are generally more trustworthy (certainly with respect to the non-spherical **spheroid** fraction) than those that do not include  $\delta_{355}$ .

In the following, we are hence contrasting the results for the volume concentration, the effective radius, and the SSA according to the two sub-sets shown in Figure 7a and b. We want to find out if these parameters differ within and between these two groups. The difference between using 3+2+1 and 3+2+2 input data sets from the two groups (i.e. with and without  $\delta_{355}$ ) is shown in Figure 8 for volume concentration, effective radius, and 532-nm SSA, **and complex refractive index**. The correlation between Sets II and III and between Sets V and VII shows little difference for the effective radius. The use of 3+2+2 input data generally gives larger volume concentration but again little difference is found between the data sets considered in this work. **The real part of the refractive index tends to be smaller for the input data sets that include  $\delta_{355}$ , though this effect diminishes towards values of 1.55.** The strongest effect with regard to the choice of input data is found for **the imaginary part of the refractive index, and thus, the SSA**. Input data that include  $\delta_{355}$  tend to give lower values of SSA (Figure 8c, see also Figures 3 and 5) **as a result of a general shift towards higher imaginary parts (Figure 8e).** Figure 8d shows **a similar, though less pronounced tendency for the real part: data sets that include  $\delta_{355}$  give values between 1.45 and 1.58 while most values are in the range from 1.50 to 1.58 for data sets that include  $\delta_{532}$ .** a range of SSA between 0.90 and 0.98 for Sets II and V whereas we find a considerably narrower range from 0.96 to 0.98 for Sets III and VII. **The same behaviour is found when the correlation analysis in Figure 8 is expanded to the remaining input data sets (not shown).**

Figure 9 is analogous to Figure 8 but now compares volume concentration, effective radius, and SSA within the two groups identified in Figure 7. Again, the choice of input data set has the smallest effect on effective radius and volume concentration, though the latter is systematically lower for Set II compared to Sets V, VI, and VIII. We do not find a similar effect in cases that exclude  $\delta_{355}$  but still include information on particle depolarisation. For the SSA, any inversion that considers  $\delta_{355}$  seems to give similar results. We find the same pattern for data sets that exclude  $\delta_{355}$  as long as any depolarisation input is considered. All inversion input that include some depolarisation information generally give higher SSA values than the traditional 3+2 data set.

The dependence of the retrieved real and imaginary parts of the refractive index on the dust ratio is shown in Figure 10. The upper plot shows that the retrieved real parts cover a large range of values for dust ratios smaller than 60%. In addition, data sets that include  $\delta_{355}$  generally giving lower values (3+2+3 gives the lowest values) than data sets that exclude  $\delta_{355}$ . The range of results narrows for larger dust ratios for all inversion input that include depolarisation information. Only the traditional 3+2 data set gives values smaller than 1.50 for dust ratios larger than 60%. A reversed behaviour is found for the imaginary part of the refractive index in Figure 10b. Data sets that include  $\delta_{355}$  generally give larger values than those that exclude  $\delta_{355}$  with the traditional 3+2 data set leading to values that are by far the



highest. This holds particularly true for dust ratios larger than 60% for which the range of results obtained from all other input data sets narrows in the same way we found for the real part.

## 5 Discussion

We would like to start the discussion by emphasising that the results presented here are specific to the application of the non-spherical spheroid model of Dubovik *et al.* (2006). This light-scattering model has been developed for application to sun photometer measurements in the framework of AERONET. The Dubovik model marks a considerable advance when compared to treating light scattering by non-spherical particles with Mie theory. However, this light-scattering model considers rather simplified particle shapes, i.e. rotational symmetric spheroids with (i) a defined axis-ratio distribution and (ii) a fixed mixture of oblates and prolates. Because of these constraints, the Dubovik model cannot be regarded as a universal spheroid model. In fact, the specific model setup needs to be considered in comparisons to findings from other spheroid models. In addition, the Dubovik model might not be suitable to reproduce all of the light-scattering properties of non-spherical particles in the atmosphere. Indeed, comparisons to independent in-situ measurements and lidar observations of Saharan dust during SAMUM have revealed discrepancies for the retrieved complex refractive index and single-scattering albedo (Müller *et al.*, 2010). In addition, the intensive lidar parameters lidar ratio and particle linear depolarisation ratio, which can be calculated from the inferred scattering matrix, do not agree with coincident measurements at the 355- and 532-nm lidar wavelengths (Müller *et al.*, 2013).

Shin *et al.* (2018) present spectral lidar ratios and particle linear depolarisation ratios representative for mineral dust from different source regions. The authors used the AERONET data base of level 2.0 sun photometer inversions. They find the best agreement to lidar observations of both parameters at the longer wavelengths of 870 and 1020 nm (Figure 1). Towards shorter wavelengths, the AERONET-derived values show an increase of the lidar ratio and a decrease of the particle linear depolarisation ratio. Both spectral behaviours are not found in lidar measurements of mineral dust (Freudenthaler *et al.*, 2009; Shin *et al.*, 2018). Other models that employ more realistic geometries of non-symmetric non-spherical particles (Gasteiger *et al.*, 2011), account for surface roughness (Kemppinen *et al.*, 2015a) and particle inhomogeneities (Kemppinen *et al.*, 2015b), or employ spheroids with wider ranges of the oblate-to-prolate ratio and the aspect ratio (Gasteiger and Freudenthaler, 2014) have been developed either specifically for use in lidar applications or used to investigate lidar-specific parameters. These models suggest improvements in inferring aerosol microphysical properties from lidar data by using measurements of  $\delta_{1064}$  in the inversion (Gasteiger and Freudenthaler, 2014). However, such alternatives generally lack the flexibility of the Dubovik model when it comes to their implementation for new applications. In addition, there are still enormous challenges involved in testing these alternatives in view of the complexity of particle shapes and the computational resources required for running simulation studies.

The results we obtain from our study are somewhat contradictory to the findings of Gasteiger and Freudenthaler (2014) and Shin *et al.* (2018) who attribute the greatest informational value and representativeness to observations of  $\delta_{1064}$ . This is likely due to the difference in the setup of the different studies. On the one hand, Gasteiger and Freudenthaler (2014) applied a

spheroid model that was constrained in neither the aspect ratio nor the oblate-to-prolate ratio of the spheroids. On the other hand, *Shin et al. (2018)* are referring to AERONET data which have been derived for scattering angles smaller than  $180^\circ$  (and extrapolated to the backscatter direction) and represent values for the entire atmospheric column. However, the strong and weak effects of using  $\delta_{355}$  and  $\delta_{1064}$ , respectively, in the inversion of lidar measurements of dust-containing aerosol layers based on the spheroid model of *Dubovik et al. (2006)* also indicate that the model's constraints on the aspect-ratio distribution and the ratio of oblates to prolates have a strong effect on making full use of the informational content provided at different wavelenths in lidar applications. We stress again that the conclusions of this study are valid only for the inversion of lidar data that resorts to describe the light-scattering properties of non-spherical dust particles by means of the spheroid model of *Dubovik et al. (2006)* and that any finding might be strongly related to the weaknesses of this particular light-scattering model (*Müller et al., 2010, 2013*). Nevertheless, no other model has been applied as widely in the inversion of lidar data (*Veselovskii et al., 2010; Di Girolamo et al., 2012; Papayannis et al., 2012; Müller et al., 2013*). In addition, there has so far been no systematic investigation of the usefulness of different depolarisation input for this particular inversion setup. We therefore believe that this work will contribute to a better understanding of the usefulness and limitations of the model of *Dubovik et al. (2006)* in lidar applications as well as to further emphasise the need for a more general model to describe light scattering by non-spherical particles at very large scattering angles.

Following on the initial work of *Veselovskii et al. (2010)*, we have performed the first systematic investigation of the effect of all possible combinations of depolarisation-related inversion input at the wavelengths of 355, 532, and 1064 nm on the retrieved aerosol microphysical properties. The aim of this study is to assess the performance of the inversion procedure to lidar measurements conducted in the presence of mixture of spherical and non-spherical particles. So far, inversions on the presence of mineral dust have only been attempted under the assumption of pure dust conditions (*Veselovskii et al., 2010; Di Girolamo et al., 2012*) or if the contribution of the non-spherical scatterers had been screened from the optical input data (*Tesche et al., 2011a, b*). We consider the the retrieved spheroid fraction of non-spherical particles needed to reproduce the measured optical properties as an indicator for the performance of our inversion setup. Based on this parameter, we conclude that any combination of depolarisation ratios that includes  $\delta_{355}$  provides a useful addition to the 3+2 data set for the inversion of lidar data using this methodology that have been collected in the presence of non-spherical particles using the Dubovik model. We emphasize again that this finding refers to using Dubovik's model with its particular setup of resorting to the use of randomly oriented spheroids for the description of light scattering by non-spherical particles in this inversion algorithm.

Our findings provide insights that go beyond previous studies that investigated the effect of adding depolarisation information to the inversion of multiwavelength lidar data:

1. Previous studies that also resort to using the Dubovik model for lidar applications focused exclusively on pure-dust situations, i.e. values of  $\delta_{532}$  of 0.30 (*Veselovskii et al., 2010, 2016; Müller et al., 2013*). These studies showed that the depolarisation ratio should not be used as input for the inversion of dust particle parameters. Instead, the inversion should

be performed with 3+2 input and the ~~non-spherical~~ **spheroid** fraction manually set to 100%. Our results show that this conclusion may have been driven by using  $\delta_{532}$ . Our study shows that  $\delta_{532}$  may not be an ideal input parameter.

2. We present the first ~~inversion~~ results **of applying the inversion with the Dubovik model to** for lidar observations of mixtures of spherical and non-spherical particles of varying degree and varying spectral behaviour of the particle linear depolarisation ratio. Considering such conditions rather than only pure-dust cases allows for using the retrieved ~~non-spherical~~ **spheroid** particle fraction as an additional indicator for the quality of the inversion results.
3. We present the first systematic (though relational) study of the effect of the choice of depolarisation input based on actual atmospheric triple-depolarisation-ratio measurements. Previous investigations of the effect of depolarisation input on the inversion results **for which Dubovik's model was used** have been restricted to using either  $\delta_{355}$  (*Di Girolamo et al.*, 2012) or  $\delta_{532}$  (*Veselovskii et al.*, 2010, 2016; *Papayannis et al.*, 2012; *Müller et al.*, 2013), and thus, could relate the findings only to the results of using the conventional 3+2 input data set. The lack of spectral depolarisation-ratio measurements under dusty conditions neither allowed for investigating how the choice of input parameters affects the quality of inversion results compared to benchmark data nor test if the choice is ideal.
4. Following the footsteps of AERONET's **data processing**, microphysical particle properties mark the next logical data product level in the analysis of multiwavelength aerosol lidar data. It is therefore of vital importance to define the minimum information needed for this purpose (i.e. the best choice of input data) as this decision relates directly to the optimum setup for lidar instruments whose measurements can provide this data product. This study represents an important step for determining that information **though it is restricted to a very specific model that is used for describing the light-scattering properties of non-spherical particles**. The main issue in that regard is weighting the benefits of using instrument setups which are already highly challenging over the added information provided by these measurements. This decision-making is of particular importance in light of future spaceborne lidar missions that will focus on aerosol profiling as well as their airborne demonstrators.

*Veselovskii et al.* (2010, 2016) use the complex refractive index in their argumentation of their preference of rejecting the depolarisation input in the inversion. They retrieve real parts of about 1.45 for pure dust, which are comparable to AERONET results. They conclude that imaginary parts obtained from the inversion of 3+2 input data lead to more realistic estimations of this parameter because values below 0.005 (derived from using 3+2+1) are below the findings from in-situ measurements (*Müller et al.*, 2013). Our ~~preliminary~~ analysis of the refractive index shows real parts of 1.50 to 1.55 for all combinations of depolarisation input for both mixed- as well as pure-dust conditions(~~not shown~~). This result is more in line with independent measurements of this parameter (*Müller et al.*, 2013). For pure dust conditions we obtain imaginary parts of up to 0.020 from the inversion of 3+2 data sets. All other sets lead to significantly lower values. For mixed-dust cases in which  $\delta_{532} < 0.25$ , we find significantly larger imaginary parts that show little difference to the results obtained from using the 3+2 input data set.

**The inversion assumes a spectrally independent complex refractive index. In contrast, mineral dust is known to show a strong increase of the imaginary part of the refractive index with smaller wavelengths. This issue has been**

explored by *Veselovskii et al. (2010)* who conclude that (i) the error of the volume concentration is estimated as 17% to 25% depending on the contribution of large particles and (ii) a fixed imaginary part refers to the mean value of the spectrally dependent imaginary part. A detailed investigation of the assumption of spectrally independent refractive indices is beyond the scope of this study.

## 5 6 Summary and conclusions

We have performed a first systematic relational investigation of the effect of exploiting different combinations of depolarisation information as input to the inversion of optical lidar data into aerosol microphysical properties. The inversion is run with spheroid kernels based on the Dubovik model for the description of light scattering by non-spherical particles. In this work, we use 3+2+3 measurements obtained with the NASA LaRC HSRL-2 during DISCOVER-AQ and the TROPOS  
10 BERTHA during SALTRACE — two out of just three lidar instruments currently capable of measuring  $\delta_\lambda$  simultaneously at three wavelengths generally used in aerosol profiling with lidar.

We have selected eleven observations. Increased values of  $\delta_{532}$  can be used as a proxy for the presence of an increased concentration of mineral dust in atmospheric layers. Eight sets of optical data have been created for each of the individual measurements. depolarisation input ranged from zero to three wavelengths. We focused on a relational study in view of the  
15 challenges connected to (i) using the AERONET light-scattering model of *Dubovik et al. (2006)* that currently provides the best possible output results for sun photometer observations and (ii) the lack of light-scattering models that are proven to work for the special condition of observing non-spherical particles at 180-degree observation angle (lidar configuration). We are comparing the output of the different inversion runs to each other and to the dust ratio obtained from the optical data. In that way we want to identify the most plausible results **that can be obtained from our specific inversion setup**.

We find that inversion without depolarisation information (i.e. the traditional 3+2 data set) cannot lead to ~~non-spherical~~  
20 **spheroid** particle fractions larger than 40% even if ~~non-spherical~~ **spheroid** kernels, i.e. the spheroid Dubovik model, are used. We also find that the use of depolarisation ratios at 532 or 1064 nm in combination with the Dubovik model give unrealistically high ~~non-spherical~~ **spheroid** particle fractions. These fractions generally exceed the dust ratio inferred from the measurements of  $\beta_{532}$  and  $\delta_{532}$  following the procedure described by *Tesche et al. (2009a)*. While it needs to be emphasized that the  
25 ~~non-spherical~~ **spheroid** fraction as inferred from the inversion is an artificial, non-physical parameter, it might be considered as the ratio of the concentration of dust to total particle concentration **for this particular study**. The most realistic ~~non-spherical~~ **spheroid** fraction **in relation to the lidar-derived dust ratio** is found when using depolarisation information at 355 nm.

The choice of depolarisation input wavelength was found to have little effect on the retrieval of extensive parameters such as the volume concentration and the effective radius that can be derived from this extensive parameter. The use of depolarisation input at any wavelength, i.e. 355 nm or 532 nm or 1064 nm, generally increases the retrieved values of the 532-nm SSA compared to the 3+2 input. ~~Our hypothesis is that~~ **This is because** the use of depolarisation information leads to a lower values  
30 of the imaginary part compared to the inversion in which the traditional 3+2 data set is used. Consequently SSA increases. We conclude **from our relational investigation** that any choice of input data ~~the is acceptable as long as it~~ **that** contains  $\delta_{355}$

seems to provide more reasonable results of the spheroid inversion than input data sets without  $\delta_{355}$  or any depolarisation information at all. However, we do not find a significant advantage of using three  $\delta$  over using  $\delta$  at fewer wavelengths. This result leads us to conclude that the most suitable input data set for lidar inversion using spheroid kernels according to Dubovik *et al.* (2006) is 3+2+1 in which we use  $\delta_{355}$ .

- 5     **We investigated the connection between output from different sets of input data in and inversion in which the light-scattering properties of non-spherical particles are described by the spheroid model of Dubovik *et al.* (2006).** Definite conclusions can only be drawn if coincident independent in-situ data were available for the considered cases. An alternative approach to circumvent any reliance on the accuracy of the ~~non-spherical~~ **spheroid** fraction would be to separate the optical input data according to the contributions of spherical and non-spherical particles (Tesche *et al.*, 2009a, 2011b) before running the
- 10 **inversion with ~~non-spherical~~ spheroid fractions set to zero and unity, respectively. Alternatively, a more universal spheroid model without a fixed oblate-to-prolate ratio or aspect ratio distribution (Gasteiger and Freudenthaler, 2014) could be applied in the inversion system.** In any case, the use of spheroids for approximating light scattering by non-spherical particles in lidar applications is rather limited (Müller *et al.*, 2010). New models with more realistic particle geometries (Kahnert *et al.*, 2014; Nousiainen and Kandler, 2015) will be needed to accurately link microphysical properties to the optical parameters
- 15 **measured with advanced aerosol lidars (Gasteiger *et al.*, 2011). It is quite possible that such improved light-scattering models will show better capability for extracting the informational content provided by particle linear depolarisation ratios at 532 and 1064 nm.**

*Data availability.* DISCOVER-AQ data are publicly available from the Science Team at the NASA Atmospheric Science Data Center (ASDC) via doi:10.5067/Aircraft/DISCOVER-AQ/Aerosol-TraceGas. SALTRACE data are available from M. Haarig upon request.

- 20 *Author contributions.* MT, DM, and AK had the idea for this study and performed the inversion runs. SPB, RAF and CAH collected the HSRL-2 data during DISCOVER-AQ. MH collected the BERTHA data during SALTRACE. MT performed the analysis and interpretation of the inversion data and prepared the figures. All authors contributed to the discussion of the findings and the preparation of the manuscript.

*Competing interests.* The authors declare that no competing interests are present.

*Acknowledgements.* This activity is supported by ACTRIS Research Infrastructure (EU H2020-R&I) under grant agreement no. 654109.



## References

- Ansmann, A. and D. Müller (2005), Lidar and atmospheric aerosol particles, in *LIDAR—Range-resolved optical remote sensing of the atmosphere*, edited by C. Weitkamp, pp. 105-141, Springer, New York, NY, USA.
- Baars, H., Kanitz, T., Engelmann, R., Althausen, D., Heese, B., Komppula, M., Preißler, J., Tesche, M., Ansmann, A., Wandinger, U., Lim,  
5 J.-H., Ahn, J. Y., Stachlewska, I. S., Amiridis, V., Marinou, E., Seifert, P., Hofer, J., Skupin, A., Schneider, F., Bohlmann, S., Foth, A.,  
Bley, S., Pfüller, A., Giannakaki, E., Lihavainen, H., Viisanen, Y., Hooda, R. K., Pereira, S. N., Bortoli, D., Wagner, F., Mattis, I., Janicka,  
L., Markowicz, K. M., Achtert, P., Artaxo, P., Pauliquevis, T., Souza, R. A. F., Sharma, V. P., van Zyl, P. G., Beukes, J. P., Sun, J., Rohwer,  
E. G., Deng, R., Mamouri, R.-E., and Zamorano, F.: An overview of the first decade of PollyNET: An emerging network of automated  
Raman-polarization lidars for continuous aerosol profiling, *Atmos. Chem. Phys.*, 16, 5111-5137, [https://doi.org/10.5194/acp-16-5111-](https://doi.org/10.5194/acp-16-5111-2016)  
10 2016, 2016.
- Bi, L., Lin, W., Liu, D., and Zhang, K.: Assessing the depolarisation capabilities of nonspherical particles in a super-ellipsoidal shape  
space, *Opt. Expr.*, 26, 1726-1742, <https://doi.org/10.1364/OE.26.001726>, 2018.**
- Burton, S. P., Ferrare, R. A., Hostetler, C. A., Hair, J. W., Rogers, R. R., Obland, M. D., Butler, C. F., Cook, A. L., Harper, D. B., and Froyd,  
K. D.: Aerosol classification using airborne High Spectral Resolution Lidar measurements – methodology and examples, *Atmos. Meas.*  
15 *Tech.*, 5, 73-98, <https://doi.org/10.5194/amt-5-73-2012>, 2012.
- Burton, S. P., Vaughan, M. A., Ferrare, R. A., and Hostetler, C. A.: Separating mixtures of aerosol types in airborne High Spectral Resolution  
Lidar data, *Atmos. Meas. Tech.*, 7, 419-436, <https://doi.org/10.5194/amt-7-419-2014>, 2014.
- Burton, S. P., Hair, J. W., Kahnert, M., Ferrare, R. A., Hostetler, C. A., Cook, A. L., Harper, D. B., Berkoff, T. A., Seaman, S. T., Collins, J.  
E., Fenn, M. A., and Rogers, R. R.: Observations of the spectral dependence of linear particle depolarisation ratio of aerosols using NASA  
20 Langley airborne High Spectral Resolution Lidar, *Atmos. Chem. Phys.*, 15, 13453-13473, <https://doi.org/10.5194/acp-15-13453-2015>,  
2015.
- Burton, S. P., Hostetler, C. A., Cook, A. L., Hair, J. W., Seaman, S. T., Scola, S., Harper, D. B., Smith, J. A., Fenn, M. A., Ferrare, R. A.,  
Saide, P. E., Chemyakin, E. V., and Müller, D.: Calibration of a high spectral resolution lidar using a Michelson interferometer, with data  
examples from ORACLES, *Appl. Opt.*, 57, 6061-6075, <https://doi.org/10.1364/AO.57.006061>, 2018.
- 25 DISCOVER-AQ Science Team, Hampton, VA, USA: NASA Atmospheric Science Data Center (ASDC), Accessed 03/09/2018 at  
[doi:10.5067/Aircraft/DISCOVER-AQ/Aerosol-TraceGas](https://doi.org/10.5067/Aircraft/DISCOVER-AQ/Aerosol-TraceGas)
- Di Girolamo, P., Summa, D., Bhawar, R., Di Iorio, T., Cacciani, M., Veselovskii, I., Dubovik, O., and Kolgotin, A.: Raman lidar observations  
of a Saharan dust outbreak event: characterization of the dust optical properties and determination of particle size and microphysical  
parameters, *Atmos. Environ.*, 50, 66-78, 2012.
- 30 Dubovik, O., Sinyuk, A., Lapyonok, T., Holben, B. N., Mishchenko, M., Yang, P., Eck, T. F., Volten, H., Muñoz, O., Veihelmann, B., van  
der Zande, W. J., Léon, J.-F., Sorokin, M., and Slutsker, I.: Application of spheroid models to account for aerosol particle nonsphericity in  
remote sensing of desert dust, *J. Geophys. Res.*, 111, D11208, <https://doi.org/10.1029/2005JD006619>, 2006.
- Freudenthaler, V., Esselborn, M., Wiegner, M., Heese, B., Tesche, M., Ansmann, A., Müller, D., Althausen, D., Wirth, M., Fix, A., Ehret,  
G., Knippertz, P., Toledano, C., Gasteiger, J., Garhammer, M., and Seefeldner, M.: depolarisation ratio profiling at several wavelengths in  
pure Saharan dust during SAMUM 2006, *Tellus*, 61B, 165–179, <https://doi.org/10.1111/j.1600-0889.2008.00396.x>, 2009.
- 35 **Freudenthaler, V.: About the effects of polarising optics on lidar signals and the  $\Delta 90$  calibration, *Atmos. Meas. Tech.*, 9, 4181-4255,  
<https://doi.org/10.5194/amt-9-4181-2016>, 2016.**

- Gasteiger, J., Wiegner, M., Groß, S., Freudenthaler, V., Toledano, C., Tesche, M., and Kandler, K.: Modeling lidar-relevant optical properties of complex mineral dust aerosols, *Tellus B*, 63, 725–741, <https://doi.org/10.1111/j.1600-0889.2011.00559.x>, 2011.
- Gasteiger, J. and Freudenthaler, V.: Benefit of depolarisation ratio at  $\lambda = 1064$  nm for the retrieval of the aerosol microphysics from lidar measurements, *Atmos. Meas. Tech.*, 7, 3773–3781, <https://doi.org/10.5194/amt-7-3773-2014>, 2014.
- 5 **Gialitaki, A., Tsekeri, A., Amiridis, V., Marinou, E., Haarig, M., Baars, H., and Ansmann, A.: Interpreting the Particle Linear depolarisation Ratio spectral dependence of aged stratospheric smoke using T-matrix simulations, *Geophysical Research Abstracts*, Vol. 21, EGU2019-1678, 2019 EGU General Assembly, 2019.**
- Gimmestad, G. G.: Reexamination of depolarisation in lidar measurements, *Appl. Optics*, 47, 3795–3802, <https://doi.org/10.1364/AO.47.003795>, 2008.
- 10 Groß, S., Esselborn, M., Weinzierl, B., Wirth, M., Fix, A., and Petzold, A.: Aerosol classification by airborne high spectral resolution lidar observations, *Atmos. Chem. Phys.*, 13, 2487–2505, <https://doi.org/10.5194/acp-13-2487-2013>, 2013.
- Groß, S., Freudenthaler, V., Schepanski, K., Toledano, C., Schäfler, A., Ansmann, A., and Weinzierl, B.: Optical properties of long-range transported Saharan dust over Barbados as measured by dual-wavelength depolarisation Raman lidar measurements, *Atmos. Chem. Phys.*, 15, 11067–11080, <https://doi.org/10.5194/acp-15-11067-2015>, 2015.**
- 15 Haarig, M., Ansmann, A., Althausen, D., Klepel, A., Groß, S., Freudenthaler, V., Toledano, C., Mamouri, R.-E., Farrell, D. A., Prescod, D. A., Marinou, E., Burton, S. P., Gasteiger, J., Engelmann, R., and Baars, H.: Triple-wavelength depolarisation-ratio profiling of Saharan dust over Barbados during SALTRACE in 2013 and 2014, *Atmos. Chem. Phys.*, 17, 10767–10794, <https://doi.org/10.5194/acp-17-10767-2017>, 2017a.
- Haarig, M., Ansmann, A., Gasteiger, J., Kandler, K., Althausen, D., Baars, H., Radenz, M., and Farrell, D. A.: Dry versus wet marine particle optical properties: RH dependence of depolarisation ratio, backscatter, and extinction from multiwavelength lidar measurements during SALTRACE, *Atmos. Chem. Phys.*, 17, 14199–14217, <https://doi.org/10.5194/acp-17-14199-2017>, 2017b.
- 20 Haarig, M., Ansmann, A., Baars, H., Jimenez, C., Veselovskii, I., Engelmann, R., and Althausen, D.: depolarisation and lidar ratios at 355, 532, and 1064 nm and microphysical properties of aged tropospheric and stratospheric Canadian wildfire smoke, *Atmos. Chem. Phys.*, 18, 11847–11861, <https://doi.org/10.5194/acp-18-11847-2018>, 2018.
- 25 Hair, J. W., Hostetler, C. A., Cook, A. L., Harper, D. B., Ferrare, R. A., Mack, T. L., Welch, W., Izquierdo, L. R., and Hovis, F. E.: Airborne high-spectral-resolution lidar for profiling aerosol optical profiles, *Appl. Opt.*, 47, 6734–6752, <https://doi.org/10.1364/AO.47.006734>, 2008.
- Holben, B. N., Eck, T. F., Slutsker, I., Tanré, D., Buis, J., Setzer, A., Vermote, E., Reagan, J., Kaufman, Y. J., and Nakajima, T.: AERONET—A federated instrument network and data archive for aerosol characterization, *Rem. Sens. Environ.*, 66, 1–16, [https://doi.org/10.1016/S0034-4257\(98\)00031-5](https://doi.org/10.1016/S0034-4257(98)00031-5), 1998.
- 30 Hu, Q., Goloub, P., Veselovskii, I., Bravo-Aranda, J.-A., Popovici, I., Podvin, T., Haeffelin, M., Lopatin, A., Pietras, C., Huang, X., Torres, B., and Chen, C.: A study of long-range transported smoke aerosols in the Upper Troposphere/Lower Stratosphere, *Atmos. Chem. Phys. Discuss.*, <https://doi.org/10.5194/acp-2018-655>, in review, 2018 ***Atmos. Chem. Phys.*, 19, 1173–1193, <https://doi.org/10.5194/acp-19-1173-2019>, 2019.**
- 35 Kahnert, M., Nousiainen, T., and Lindqvist, H.: Review: Model particles in atmospheric optics, *J. Quant. Spectrosc. Rad. Trans.*, 146, 41–58, <http://dx.doi.org/10.1016/j.jqsrt.2014.02.014>, 2014.
- Kemppinen, O., Nousiainen, T., and Lindqvist, H.: The impact of surface roughness on scattering by realistically shaped wavelength-scale dust particles, *J. Quant. Spectrosc. Rad. Trans.*, 150, 55–67, <https://doi.org/10.1016/j.jqsrt.2014.05.024>, 2015a.**

- Kemppinen, O., Nousiainen, T., and Jeong, G. Y.: Effects of dust particle internal structure on light scattering, *Atmos. Chem. Phys.*, **15**, 12011–12027, <https://doi.org/10.5194/acp-15-12011-2015>, 2015b.
- Mamouri, R.-E. and Ansmann, A.: Fine and coarse dust separation with polarization lidar, *Atmos. Meas. Tech.*, **7**, 3717–3735, <https://doi.org/10.5194/amt-7-3717-2014>, 2014.
- 5 Mamouri, R.-E. and Ansmann, A.: Potential of polarization/Raman lidar to separate fine dust, coarse dust, maritime, and anthropogenic aerosol profiles, *Atmos. Meas. Tech.*, **10**, 3403–3427, <https://doi.org/10.5194/amt-10-3403-2017>, 2017.
- Miffre, A., Mehri, T., Francis, M., and Rairoux, P.: UV–VIS depolarisation from Arizona Test Dust particles at exact backscattering angle, *J. Quant. Spectr. Rad. Trans.*, **169**, 79–90, <https://doi.org/10.1016/j.jqsrt.2015.09.016>, 2016.
- Mishchenko, M. I., Dlugach, J. M., and Liu, L.: Linear depolarisation of lidar returns by aged smoke particles, *Appl. Opt.*, **55**, 9968–9973, <https://doi.org/10.1364/AO.55.009968>, 2016.
- 10 Müller, D., Wandinger, U., Althausen, D., Mattis, I., and Ansmann, A.: Retrieval of physical particle properties from lidar observations of extinction and backscatter at multiplewavelengths, *Appl. Opt.*, **37**, 2260–2263, 1998.
- Müller, D., Wandinger, U., and Ansmann, A.: Microphysical particle parameters from extinction and backscatter lidar data by inversion with regularization: Theory, *Appl. Opt.*, **38**, 2346–2357, 1999a.
- 15 Müller, D., Wandinger, U., and Ansmann, A.: Microphysical particle parameters from extinction and backscatter lidar data by in-version with regularization: Simulation, *Appl. Opt.*, **38**, 2358–2368, 1999b.
- Müller, D., Wandinger, U., Althausen, D., and Fiebig, M.: Comprehensive particle characterization from three-wavelength Raman-lidar observations, *Appl. Opt.*, **40**, 4863–4869, 2001.
- Müller, D., Ansmann, A., Freudenthaler, V., Kandler, K., Toledano, C., Hiebsch, A., Gasteiger, J., Esselborn, M., Tesche, M., Heese, B., and Althausen, D.: Mineral dust observed with AERONET Sun photometer, Raman lidar, and in situ instruments during SAMUM 2006: Shape-dependent particle properties, *J. Geophys. Res.*, **115**, <https://doi.org/10.1029/2009JD012523>, 2010.
- 20 Müller, D., Veselovskii, I., Kolgotin, A., Tesche, M., Ansmann, A., and Dubovik, O.: Vertical profiles of pure dust (SAMUM-1) and mixed smoke-dust plumes (SAMUM-2) inferred from inversion of multiwavelength Raman/polarization lidar data and comparison to AERONET retrievals and in-situ observations, *Appl. Optics*, **52**, 3178–3202, <https://doi.org/10.1364/AO.52.003178>, 2013.
- 25 Müller, D., Hostetler, C. A., Ferrare, R. A., Burton, S. P., Chemyakin, E., Kolgotin, A., Hair, J. W., Cook, A. L., Harper, D. B., Rogers, R. R., Hare, R. W., Cleckner, C. S., Obland, M. D., Tomlinson, J., Berg, L. K., and Schmid, B.: Airborne Multiwavelength High Spectral Resolution Lidar (HSRL-2) observations during TCAP 2012: vertical profiles of optical and microphysical properties of a smoke/urban haze plume over the northeastern coast of the US, *Atmos. Meas. Tech.*, **7**, 3487–3496, <https://doi.org/10.5194/amt-7-3487-2014>, 2014.
- Müller, D., Böckmann, C., Kolgotin, A., Schneidenbach, L., Chemyakin, E., Rosemann, J., Znak, P., and Romanov, A.: Microphysical particle properties derived from inversion algorithms developed in the framework of EARLINET, *Atmos. Meas. Tech.*, **9**, 5007–5035, <https://doi.org/10.5194/amt-9-5007-2016>, 2016.
- 30 Nousiainen, T. and Kandler, K.: Light scattering by atmospheric mineral dust particles. In: Kokhanovsky A. (eds) *Light Scattering Reviews* 9. Springer Praxis Books. Springer, Berlin, Heidelberg, 2015.
- Papayannis, A., Mamouri, R. E., Amiridis, V., Remoundaki, E., Tsaknakis, G., Kokkalis, P., Veselovskii, I., Kolgotin, A., Nenes, A., and Fountoukis, C.: Optical-microphysical properties of Saharan dust aerosols and composition relationship using a multi-wavelength Raman lidar, in situ sensors and modelling: a case study analysis, *Atmos. Chem. Phys.*, **12**, 4011–4032, <https://doi.org/10.5194/acp-12-4011-2012>, 2012.

- Pappalardo, G., Amodeo, A., Apituley, A., Comeron, A., Freudenthaler, V., Linné, H., Ansmann, A., Bösenberg, J., D'Amico, G., Mattis, I., Mona, L., Wandinger, U., Amiridis, V., Alados-Arboledas, L., Nicolae, D., and Wiegner, M.: EARLINET: towards an advanced sustainable European aerosol lidar network, *Atmos. Meas. Tech.*, 7, 2389-2409, <https://doi.org/10.5194/amt-7-2389-2014>, 2014.
- Shin, S.-K., Tesche, M., Kim, K., Kezoudi, M., Tatarov, B., Müller, D., and Noh, Y.: On the spectral depolarisation and lidar ratio of mineral dust provided in the AERONET version 3 inversion product, *Atmos. Chem. Phys.*, 18, 12735-12746, <https://doi.org/10.5194/acp-18-12735-2018>, 2018.
- Shin, S.-K., Tesche, M., Müller, D., and Noh, Y.: Technical note: Absorption aerosol optical depth components from AERONET observations of mixed dust plumes, *Atmos. Meas. Tech.*, 12, 607-618, <https://doi.org/10.5194/amt-12-607-2019>, 2019.**
- Tesche, M., Ansmann, A., Müller, D., Althausen, D., Engelmann, R., Freudenthaler, V., and Groß, S.: Vertically resolved separation of dust and smoke over Cape Verde using multiwavelength Raman and polarization lidars during Saharan Mineral Dust Experiment 2008, *J. Geophys. Res.*, 114, D13202, <https://doi.org/10.1029/2009JD011862>, 2009a.
- Tesche, M., Ansmann, A., Müller, D., Althausen, D., Mattis, I., Heese, B., Freudenthaler, V., Wiegner, M., Esselborn, M., Pisani, G., and Knippertz, P.: Vertical profiling of Saharan dust with Raman lidars and airborne HSRL in southern Morocco during SAMUM, *Tellus B*, 61, 144–164, <https://doi.org/10.1111/j.1600-0889.2008.00390.x>, 2009b.
- Tesche, M., Groß, S., Ansmann, A., Müller, D., Althausen, D., Freudenthaler, V., and Esselborn, M.: Profiling of Saharan dust and biomass-burning smoke with multiwavelength polarization Raman lidar at Cape Verde, *Tellus*, 63B, 649–676, <https://doi.org/10.1111/j.1600-0889.2011.00548.x>, 2011a.
- Tesche, M., Müller, D., Groß, S., Ansmann, A., Althausen, D., Freudenthaler, V., Weinzierl, B., Veira, A., and Petzold, A.: Optical and microphysical properties of smoke over Cape Verde inferred from multiwavelength lidar measurements, *Tellus*, 63B, 677-694, <https://doi.org/10.1111/j.1600-0889.2011.00549.x>, 2011b.
- Veselovskii, I., Kolgotin, A., Griaznov, V., Müller, D., Wandinger, U., and Whiteman, D.: Inversion with regularization for the retrieval of tropospheric aerosol parameters from multi-wavelength lidar sounding, *Appl. Optics*, 41, 3685-3699, 2002.
- Veselovskii, I., Dubovik, O., Kolgotin, A., Lapyonok, T., Di Girolamo, P., Summa, D., Whiteman, D. N., Mishchenko, M., and Tanré, D.: Application of randomly oriented spheroids for retrieval of dust particle parameters from multiwavelength lidar measurements, *J. Geophys. Res.*, 115, D21203, <https://doi.org/10.1029/2010JD014139>, 2010.
- Veselovskii, I., Goloub, P., Podvin, T., Bovchaliuk, V., Derimian, Y., Augustin, P., Fourmentin, M., Tanre, D., Korenskiy, M., Whiteman, D. N., Diallo, A., Ndiaye, T., Kolgotin, A., and Dubovik, O.: Retrieval of optical and physical properties of African dust from multiwavelength Raman lidar measurements during the SHADOW campaign in Senegal, *Atmos. Chem. Phys.*, 16, 7013-7028, <https://doi.org/10.5194/acp-16-7013-2016>, 2016.
- Weinzierl, B., Ansmann, A., Prospero, J. M., Althausen, D., Benker, N., Chouza, F., Dollner, M., Farrell, D., Fomba, W. K., Freudenthaler, V., Gasteiger, J., Groß, S., Haarig, M., Heinold, B., Kandler, K., Kristensen, T. B., Mayol-Bracero, O. L., Müller, T., Reitebuch, O., Sauer, D., Schäfler, A., Schepanski, K., Spanu, A., Tegen, I., Toledano, C., and Walser, A.: The Saharan Aerosol Long-range Transport and Aerosol-Cloud-Interaction Experiment (SALTRACE): overview and selected highlights, *B. Am. Meteorol. Soc.*, 98, 1427–1451, <https://doi.org/10.1175/BAMSD-15-00142.1>, 2017.
- Wiegner, M., Gasteiger, J., Kandler, K., Weinzierl, B., Rasp, K., Esselborn, M., Freudenthaler, V., Heese, B., Toledano, C., Tesche, M., and Althausen, D.: Numerical simulations of optical properties of Saharan dust aerosols with emphasis on lidar applications, *Tellus*, 61B, 180–194, 2009.**

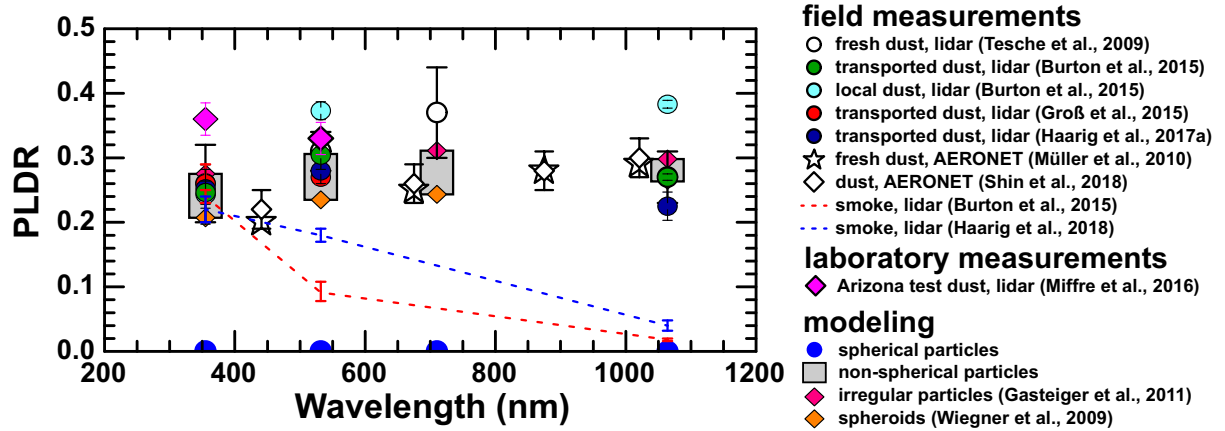

Figure 1. Overview of particle linear depolarisation ratios for pure mineral dust from field measurements (Tesche et al., 2009a; Burton et al., 2015; Groß et al., 2015; Haarig et al., 2017a), laboratory studies (Miffre et al., 2016), AERONET observations (Müller et al., 2010; Shin et al., 2018), and modelling (Wiegner et al., 2009; Gasteiger et al., 2011). The use of Mie theory (spherical particles) gives values of zero. The range for modelling results is defined by the studies of Wiegner et al. (2009) (lower boundary, spheroids) and Gasteiger et al. (2011) (upper boundary, mixtures of irregularly shaped particles). The blue and red dashed lines show that field measurements can reveal high depolarisation ratios for biomass-burning smoke as well (Burton et al., 2015; Haarig et al., 2018).

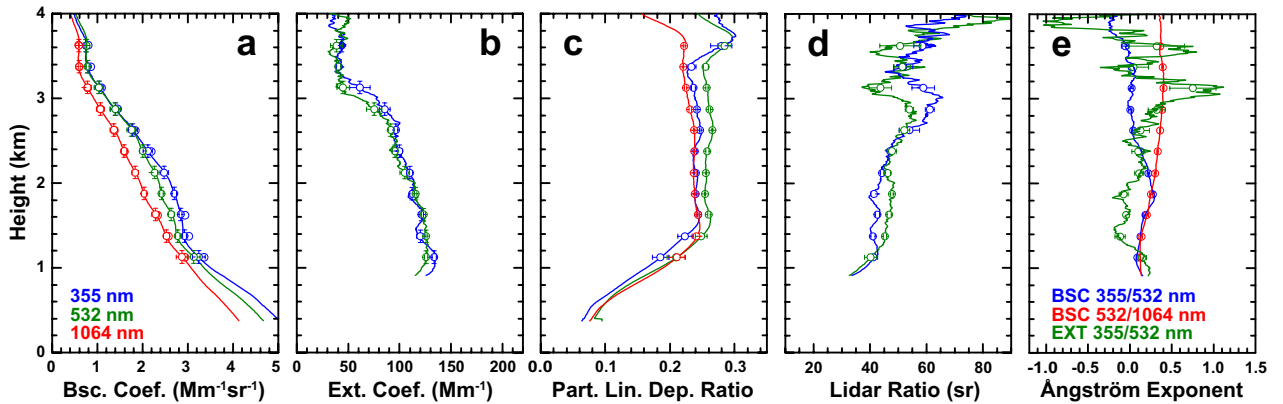

Figure 2. BERTHA measurement from 2310 to 0210 UTC on 20-21 June 2014 during SALTRACE in terms of (a) backscatter coefficient, (b) extinction coefficients, (c) particle linear depolarisation ratios, (d) lidar ratios, and (e) backscatter- and extinction-related Ångström exponents. Colours mark the corresponding wavelengths or wavelengths pairs. The measurement is representative for pure mineral dust conditions (Haarig et al., 2017a). The coloured circles mark the data points we height averages used to compile the eight variations of input data sets for our data inversion (Table 2). Error bars refer to the standard deviation of the height average. Further details on this measurement are given in Table 1.



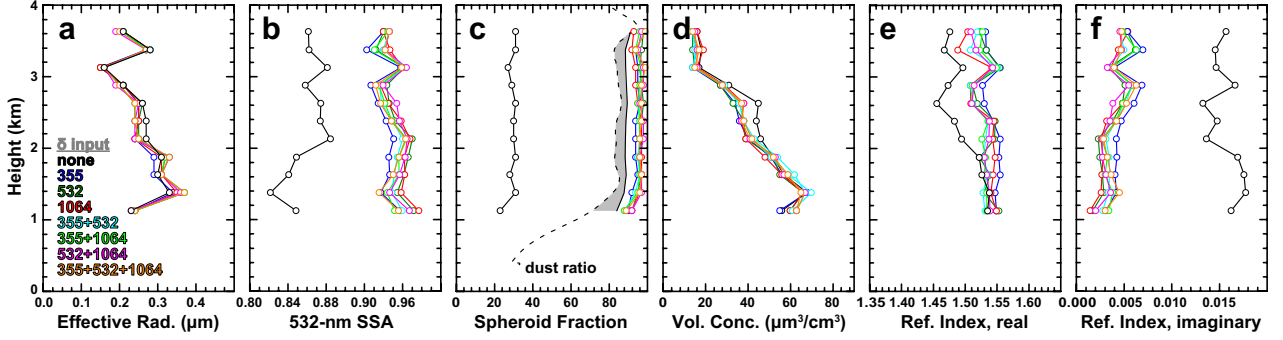

**Figure 3.** Inversion results of (a) effective radius, (b) 532-nm SSA, non-spherical (c) spheroid fraction, and (d) volume concentration, and (e) real and (f) imaginary part of the refractive index for eight inversion runs with varying depolarisation-ratio input (colours, see also Table 2) using the input data presented in Figure 2. The dashed and dash-dotted lines in the plot of the non-spherical fraction (c) refers to the contribution of dust to the 532-nm backscatter coefficient that can be obtained according to the procedures described by *Tesche et al.* (2009b) (dust, two-component mixture) and *Mamouri and Ansmann* (2017) (fine and coarse dust, three-component mixture), respectively. The grey area between the two lines marks the likely range of the dust ratio as defined by the two approaches.

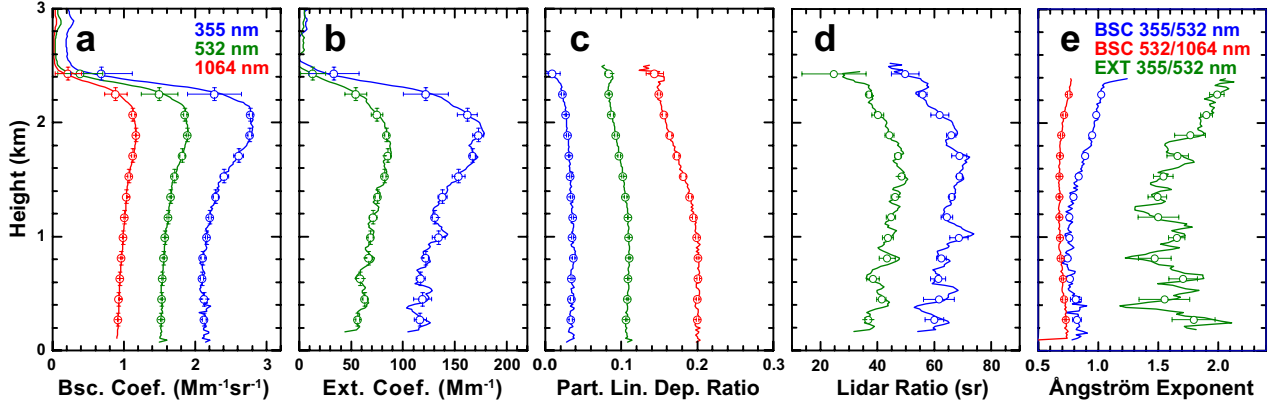

**Figure 4.** Same as Figure 3 but for an HSRL-2 measurement performed during the second DISCOVER-AQ Texas flight on 25 September 2013 in the vicinity of Deer Park (29.670°N, 95.128°W). The coloured circles mark the data points we used to compile the inversion input data sets (Table 2). Details on the time of flight, and dust mixing ratio and aerosol types are given in Table 1.

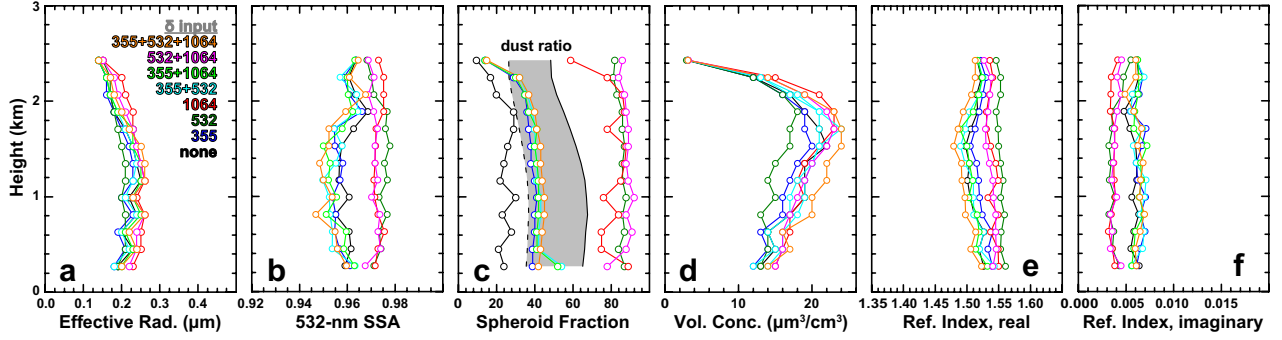

**Figure 5.** Same as Figure 3 but for the input data presented in Figure 4. The dashed line refers to the profile of the dust mixing ratio obtained according to *Burton et al. (2012)*.

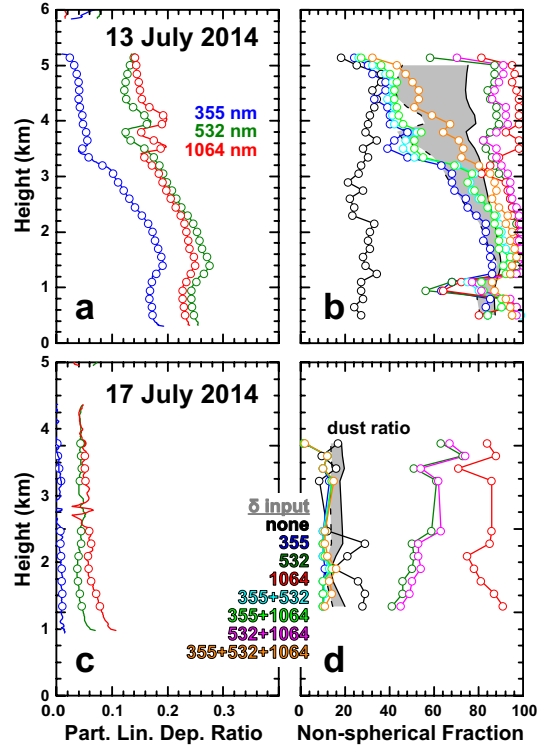

**Figure 6.** Profiles of (a and c)  $\delta_\lambda$  and (b and d) the retrieved non-spherical fraction for DISCOVER-AQ Colorado flights on 13 and 17 July 2014. Note that values differ from Figure 5 in *Burton et al. (2015)* as we have used a longer averaging period of 23 minutes in our work (see Table 1).

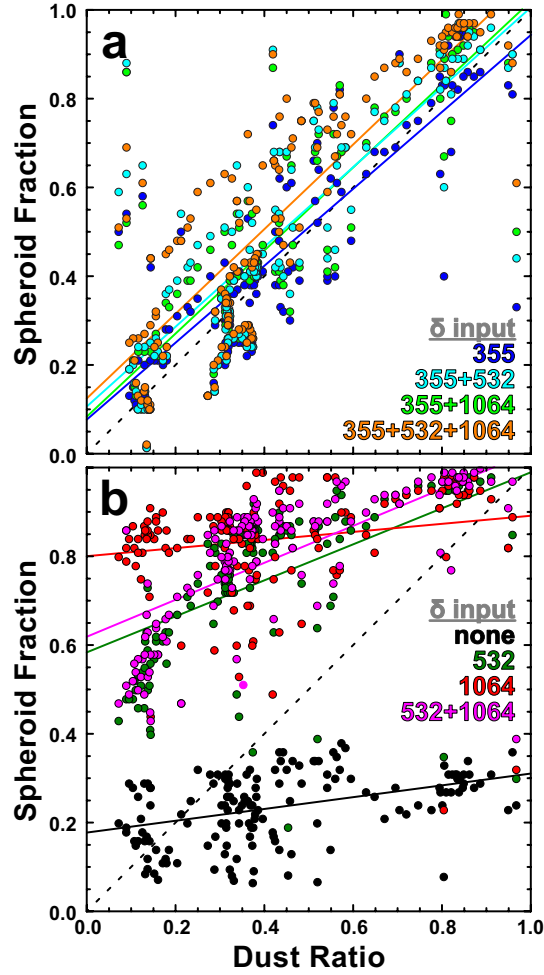

**Figure 7.** Connection between the retrieved **spheroid** fraction of non-spherical particles (from inversion) and the ratio of non-spherical particles to the 532-nm backscatter coefficient (from lidar measurements of  $\delta_{532}$ ) for the input data sets listed in Table 2 and the cases listed in Table 1. We split data sets according to with (a) and without (b) the use of  $\delta_{355}$ , i.e. Sets II, V, VI and VIII and Sets I, III, IV and VII, respectively.

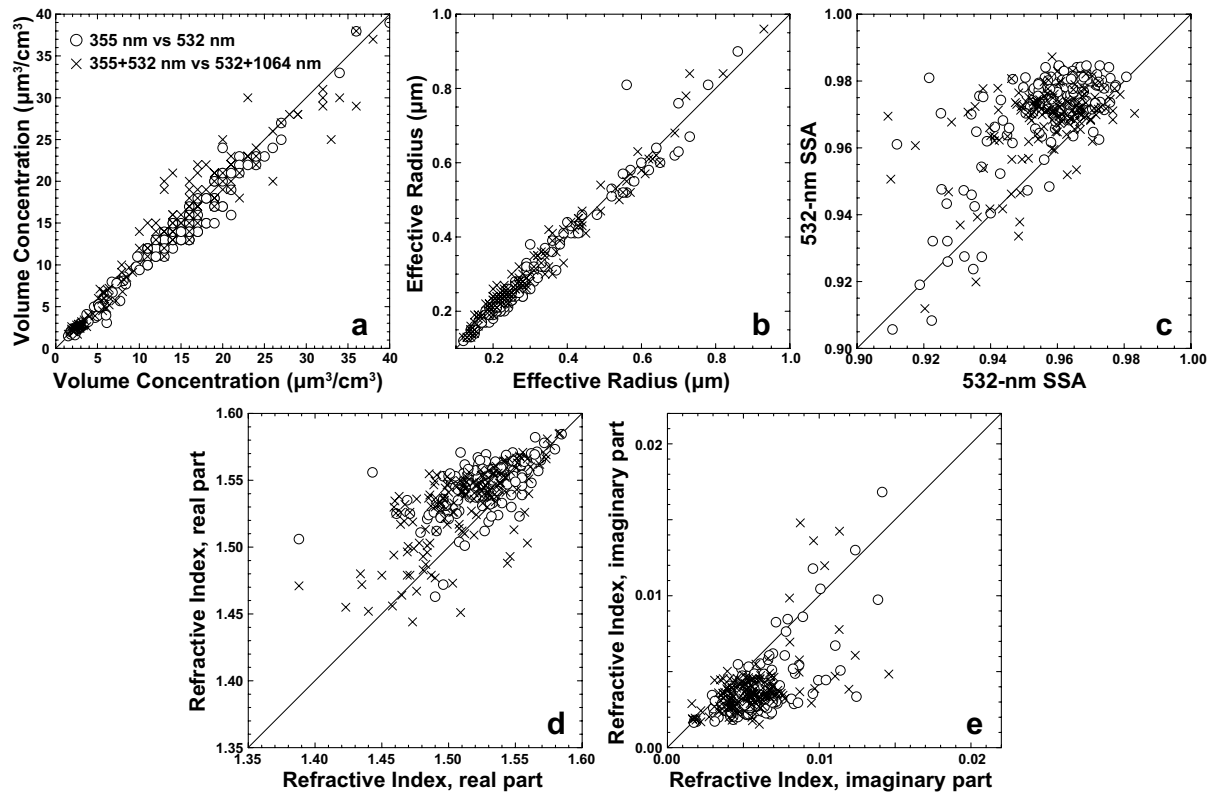

**Figure 8.** Correlation of inversion outputs for (a) volume concentration, (b) effective radius, (c) 532-nm SSA, of the 3+2+1 Sets II and III (circles) and the 3+2+2 Sets V and VII (crosses) and (d) real and (e) imaginary part of the refractive index obtained from inversion runs that use a single particle linear depolarisation ratio at 355 nm or 532 nm (3+2+1, circles) or two particle linear depolarisation ratios at 355 and 532 nm or 532 and 1064 nm (3+2+2, crosses) as input data.

**Figure 9.** Same as Figure 8 but for inversion outputs with and without the use of  $\delta_{355}$ .

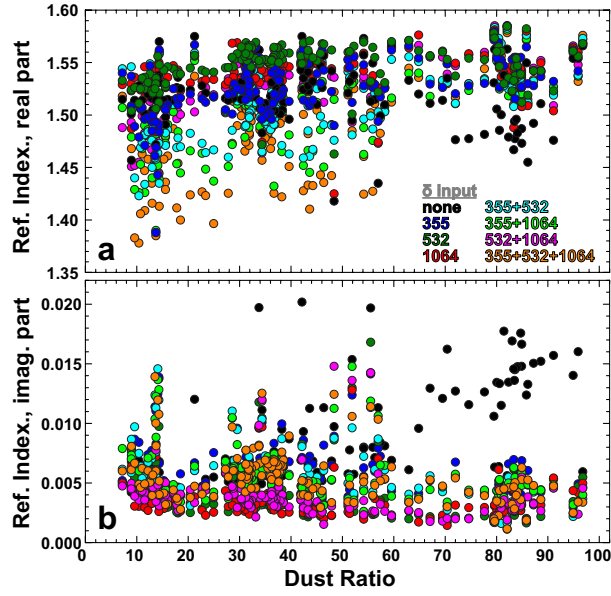

Figure 10. The retrieved (a) real and (b) imaginary parts of the refractive index and their connection to the dust ratio for the different input data sets.



**Table 1.** Overview of the 3+2+3 lidar measurements taken with BERTHA and HSRL-2 and used in this study. The HSRL-2 aerosol type was determined following the procedure outlined in *Burton et al. (2012)*. Note that HSRL-2 measurements include transit flights. **The lower and upper values for the range of dust ratios refer to values obtained from using methods described by Tesche et al. (2009b) and Mamouri and Ansmann (2014) (sum of fine and coarse dust), respectively.**

| date                                                                 | time (UTC)  | height (km) | mean $\delta_{532}$ | dust ratio (%) | aerosol type                     |
|----------------------------------------------------------------------|-------------|-------------|---------------------|----------------|----------------------------------|
| HSRL-2: DISCOVER-AQ California (2013), Texas (2013), Colorado (2014) |             |             |                     |                |                                  |
| 20130130                                                             | 1656 - 1712 | 0.3 - 1.0   | 0.05±0.04           | 16–65          | urban/pollution, fresh smoke     |
|                                                                      |             | 1.0 - 1.2   | 0.28±0.04           | 89–90          | dusty mix                        |
| 20130208                                                             | 1737 - 1802 | 2.0 - 2.4   | 0.32±0.04           | 100–94         | dusty mix                        |
|                                                                      |             | 3.8 - 4.2   | 0.12±0.01           | 40–70          | dusty mix, urban/pollution       |
| 20130925                                                             | 2057 - 2105 | 0.3 - 2.4   | 0.10±0.01           | 35–61          | dusty mix, urban/pollution       |
| 20130926                                                             | 2036 - 2041 | 0.3 - 2.1   | 0.10±0.01           | 35–60          | dusty mix, urban/pollution       |
| 20130928                                                             | 1612 - 1617 | 0.3 - 1.9   | 0.04±0.01           | 14–19          | urban/pollution                  |
| 20140713                                                             | 1435 - 1446 | 0.4 - 3.0   | 0.10±0.03           | 34–56          | dusty mix, urban/pollution       |
|                                                                      | 1713 - 1736 | 0.5 - 5.1   | 0.20±0.05           | 67–83          | dusty mix                        |
| 20140717                                                             | 1917 - 1919 | 2.0 - 4.0   | 0.04±0.00           | 13–18          | urban/pollution, polluted marine |
| 20140722                                                             | 2009 - 2036 | 2.0 - 3.0   | 0.15±0.02           | 52–76          | dusty mix                        |
|                                                                      |             | 3.0 - 5.5   | 0.10±0.01           | 31–53          | urban/pollution, dusty mix       |
| BERTHA: SALTRACE, Barbados                                           |             |             |                     |                |                                  |
| 20140303                                                             | 2230 - 2330 | 1.0 - 2.8   | 0.12±0.04           | 40–61          | dusty mix                        |
| 20140620                                                             | 2310 - 0210 | 1.0 - 4.0   | 0.26±0.02           | 83–88          | mineral dust                     |

**Table 2.** Combinations of  $\delta_\lambda$  that were used as inversion input in addition to the conventional 3+2 data set (Set I) **together with the mean number of averaged solutions, statistics on the considered discrepancies, and median absolute errors (from averaging of the considered solutions) of the retrieved effective radius ( $r_{\text{eff}}$ ), single-scattering albedo (SSA), spheroid fraction (SF), volume concentration ( $v$ ), and real and imaginary part of the refractive index ( $m_r$  and  $m_i$ ) for the respective input data sets.** The lower **bottom** part of the table provides the slope, intercept, and squared correlation coefficients ( $R^2$ ) for the linear fits between dust ratio (as **obtained with the method of Tesche *et al.* 2009b**) and ~~non-spherical~~ **spheroid** fraction presented in Figure 7.

| data set                            | I     | II    | III   | IV    | V     | VI    | VII   | VIII  |
|-------------------------------------|-------|-------|-------|-------|-------|-------|-------|-------|
| 355 nm                              | -     | X     | -     | -     | X     | X     | -     | X     |
| 532 nm                              | -     | -     | X     | -     | X     | -     | X     | X     |
| 1064 nm                             | -     | -     | -     | X     | -     | X     | X     | X     |
| solutions                           | 163   | 157   | 158   | 159   | 160   | 159   | 160   | 164   |
| <b>discrepancy</b>                  |       |       |       |       |       |       |       |       |
| mean                                | 3.77  | 7.85  | 8.97  | 11.74 | 14.72 | 16.03 | 13.39 | 20.58 |
| median                              | 1     | 7     | 8     | 11    | 15    | 17    | 13    | 22    |
| range                               | 0–23  | 2–30  | 1–30  | 1–35  | 3–35  | 3–36  | 3–37  | 4–41  |
| <b>absolute error, median value</b> |       |       |       |       |       |       |       |       |
| $r_{\text{eff}}$                    | 0.043 | 0.045 | 0.036 | 0.052 | 0.054 | 0.066 | 0.061 | 0.071 |
| SSA                                 | 0.036 | 0.034 | 0.023 | 0.027 | 0.034 | 0.035 | 0.029 | 0.038 |
| SF                                  | 24    | 5     | 6     | 11    | 5     | 6     | 6     | 6     |
| $v$                                 | 4     | 4     | 3     | 5     | 4     | 6     | 4     | 6     |
| $m_r$                               | 0.068 | 0.059 | 0.046 | 0.059 | 0.065 | 0.070 | 0.062 | 0.071 |
| $m_i$                               | 0.006 | 0.005 | 0.003 | 0.004 | 0.005 | 0.005 | 0.004 | 0.005 |
| <b>linear fits, Figure 7</b>        |       |       |       |       |       |       |       |       |
| Slope                               | 0.13  | 0.87  | 0.41  | 0.09  | 0.94  | 0.90  | 0.42  | 0.95  |
| Intercept                           | 18    | 8     | 58    | 80    | 9     | 11    | 62    | 13    |
| $R^2$                               | 0.17  | 0.69  | 0.33  | 0.03  | 0.73  | 0.68  | 0.46  | 0.73  |
